# Supplementary material for: Clinical and epidemiological characterization of viral respiratory pathogens in rural Ghana: The role of SARS-CoV-2 and Malaria in the immediate post-pandemic phase
Source: Research Square preprint supplement (doi:10.21203/rs.3.rs-8287787/v1), 2026-01-12
Supplement: Supplementary file 1 [file 132e71de2fc0db90cd130967.pdf]

|                                                                                  |           |                                                                                                                      |                                                                         |                |
|----------------------------------------------------------------------------------|-----------|----------------------------------------------------------------------------------------------------------------------|-------------------------------------------------------------------------|----------------|
|  | Page<br>1 | <input type="checkbox"/> multiple choice<br><input type="radio"/> single choice<br><input type="text"/> alphanumeric | <b>CLEAR</b><br><b>Case Report Form - Enrolment</b><br><b>Community</b> | Visit Bar Code |
|----------------------------------------------------------------------------------|-----------|----------------------------------------------------------------------------------------------------------------------|-------------------------------------------------------------------------|----------------|

#### MeciA. Identification

|     |                                                              |                                                         |               |
|-----|--------------------------------------------------------------|---------------------------------------------------------|---------------|
| A01 | Hospital-ID                                                  | <input type="text"/>                                    | Screening ID: |
| A02 | Age                                                          | <input type="text"/> years                              |               |
| A03 | Sex                                                          | <input type="radio"/> male <input type="radio"/> female |               |
| A04 | Community                                                    | <input type="text"/>                                    |               |
| A05 | Date of interview                                            | <input type="text"/> (dd/mm/yy)                         |               |
| A06 | Is the patient participating in another study?               | <input type="radio"/> no <input type="radio"/> yes      |               |
|     | <input type="checkbox"/> if yes, which? <input type="text"/> |                                                         |               |

#### C. Previous drug intake

|     |                                                                              |                                                                                  |
|-----|------------------------------------------------------------------------------|----------------------------------------------------------------------------------|
| C01 | Was medication taken/given in last month?                                    | <input type="radio"/> no <input type="radio"/> yes <input type="radio"/> unknown |
|     | <input type="checkbox"/> if yes, what: (please specify all medication names) |                                                                                  |
|     | <input type="checkbox"/> antibiotics                                         | <input type="text"/>                                                             |
|     | <input type="checkbox"/> antimalarials:                                      | <input type="text"/>                                                             |
|     | <input type="checkbox"/> NSAIDs:                                             | <input type="text"/>                                                             |
|     | <input type="checkbox"/> others:                                             | <input type="text"/>                                                             |

#### D. Immunization check

|     |                                                                                                                                                                                                                                                                                                                                                                                     |
|-----|-------------------------------------------------------------------------------------------------------------------------------------------------------------------------------------------------------------------------------------------------------------------------------------------------------------------------------------------------------------------------------------|
| D01 | Did the patient receive a Covid-19 vaccine <input type="radio"/> no <input type="radio"/> yes <input type="radio"/> unknown<br><input type="checkbox"/> if yes: Number of doses received: <input type="text"/>                                                                                                                                                                      |
| D02 | COVID-19 vaccine <u>dose 1</u> :<br>Product name:<br><input type="radio"/> Sputnik <input type="radio"/> Pfizer-BioNTech <input type="radio"/> AstraZeneca <input type="radio"/> Janssen <input type="radio"/> Novavax<br><input type="radio"/> Covishield <input type="radio"/> Other: <input type="text"/> <input type="radio"/> Unknown<br>Date: <input type="text"/> (dd/mm/yy) |
|     | COVID-19 vaccine <u>dose 2</u> :<br>Product name:<br><input type="radio"/> Sputnik <input type="radio"/> Pfizer-BioNTech <input type="radio"/> AstraZeneca <input type="radio"/> Janssen <input type="radio"/> Novavax<br><input type="radio"/> Covishield <input type="radio"/> Other: <input type="text"/> <input type="radio"/> Unknown<br>Date: <input type="text"/> (dd/mm/yy) |
|     | COVID-19 vaccine <u>dose 3</u> :<br>Product name:<br><input type="radio"/> Sputnik <input type="radio"/> Pfizer-BioNTech <input type="radio"/> AstraZeneca <input type="radio"/> Janssen <input type="radio"/> Novavax<br><input type="radio"/> Covishield <input type="radio"/> Other: <input type="text"/> <input type="radio"/> Unknown<br>Date: <input type="text"/> (dd/mm/yy) |
|     | <input type="checkbox"/> If more than 3 doses: Please enter the Product name and date of further vaccinations here:                                                                                                                                                                                                                                                                 |
| D03 | Source of information:<br><input type="radio"/> documented evidence (Vaccine card/vaccine passport/facility-based record/other)<br><input type="radio"/> recall                                                                                                                                                                                                                     |

|                                                                                  |           |                                                                                                                      |                                                     |                |
|----------------------------------------------------------------------------------|-----------|----------------------------------------------------------------------------------------------------------------------|-----------------------------------------------------|----------------|
|  | Page<br>2 | <input type="checkbox"/> multiple choice<br><input type="radio"/> single choice<br><input type="text"/> alphanumeric | <b>CLEAR</b><br><b>Case Report Form - Enrolment</b> | Visit Bar Code |
| <b>E. Medical history: SARS-CoV-2 Infection</b>                                  |           |                                                                                                                      | <b>Community</b>                                    |                |

|       |                                                                                                                                                                                                                                                                                                                                                        |                                                                                                                                                                                                                                                                |                                                                                                                                                                                                                                                                                                                                                                                                                                        |
|-------|--------------------------------------------------------------------------------------------------------------------------------------------------------------------------------------------------------------------------------------------------------------------------------------------------------------------------------------------------------|----------------------------------------------------------------------------------------------------------------------------------------------------------------------------------------------------------------------------------------------------------------|----------------------------------------------------------------------------------------------------------------------------------------------------------------------------------------------------------------------------------------------------------------------------------------------------------------------------------------------------------------------------------------------------------------------------------------|
| E01   | Has the participant been infected / ill with SARS-CoV-2 / COVID-19 previously?<br><input type="radio"/> no <input type="radio"/> yes <input type="radio"/> unknown<br><input type="checkbox"/> if yes, how many times?     __ __  times<br><input type="checkbox"/> if yes, please answer the following questions (one row for each single infection): |                                                                                                                                                                                                                                                                |                                                                                                                                                                                                                                                                                                                                                                                                                                        |
|       | How many months ago?                                                                                                                                                                                                                                                                                                                                   | What is the highest level of care received?                                                                                                                                                                                                                    | How was your infection/illness confirmed?                                                                                                                                                                                                                                                                                                                                                                                              |
| E01.1 | <input type="radio"/> <1<br><input type="radio"/> 1-<3<br><input type="radio"/> 3-<6<br><input type="radio"/> 6-<12<br><input type="radio"/> ≥12<br><input type="radio"/> can't recall                                                                                                                                                                 | <input type="radio"/> Admitted to the hospital<br><input type="radio"/> Self-care/Over the counter<br><input type="radio"/> Outpatient<br><input type="radio"/> Telemedicine<br><input type="radio"/> Community facility/CHPS<br><input type="radio"/> Unknown | <input type="checkbox"/> Nose &/ throat swab test<br><input type="checkbox"/> Symptoms assessed by a doctor<br><input type="checkbox"/> Blood sample<br><input type="checkbox"/> Symptoms assessed by a non-medical professional (pharmacist, traditional healer, family member)<br><input type="checkbox"/> self-suspicion due to contact with a suspected/confirmed covid-19 case<br><input type="checkbox"/> Other, please specify: |
| E01.2 | <input type="radio"/> <1<br><input type="radio"/> 1-<3<br><input type="radio"/> 3-<6<br><input type="radio"/> 6-<12<br><input type="radio"/> ≥12<br><input type="radio"/> can't recall                                                                                                                                                                 | <input type="radio"/> Admitted to the hospital<br><input type="radio"/> Self-care/Over the counter<br><input type="radio"/> Outpatient<br><input type="radio"/> Telemedicine<br><input type="radio"/> Community facility/CHPS<br><input type="radio"/> Unknown | <input type="checkbox"/> Nose &/ throat swab test<br><input type="checkbox"/> Symptoms assessed by a doctor<br><input type="checkbox"/> Blood sample<br><input type="checkbox"/> Symptoms assessed by a non-medical professional (pharmacist, traditional healer, family member)<br><input type="checkbox"/> self-suspicion due to contact with a suspected/confirmed covid-19 case<br><input type="checkbox"/> Other, please specify: |
| E01.3 | <input type="radio"/> <1<br><input type="radio"/> 1-<3<br><input type="radio"/> 3-<6<br><input type="radio"/> 6-<12<br><input type="radio"/> ≥12<br><input type="radio"/> can't recall                                                                                                                                                                 | <input type="radio"/> Admitted to the hospital<br><input type="radio"/> Self-care/Over the counter<br><input type="radio"/> Outpatient<br><input type="radio"/> Telemedicine<br><input type="radio"/> Community facility/CHPS<br><input type="radio"/> Unknown | <input type="checkbox"/> Nose &/ throat swab test<br><input type="checkbox"/> Symptoms assessed by a doctor<br><input type="checkbox"/> Blood sample<br><input type="checkbox"/> Symptoms assessed by a non-medical professional (pharmacist, traditional healer, family member)<br><input type="checkbox"/> self-suspicion due to contact with a suspected/confirmed covid-19 case<br><input type="checkbox"/> Other, please specify: |
| E01.4 |                                                                                                                                                                                                                                                                                                                                                        |                                                                                                                                                                                                                                                                |                                                                                                                                                                                                                                                                                                                                                                                                                                        |
| E01.5 |                                                                                                                                                                                                                                                                                                                                                        |                                                                                                                                                                                                                                                                |                                                                                                                                                                                                                                                                                                                                                                                                                                        |

|                           |                                                                                                                                                                                                                                                        |
|---------------------------|--------------------------------------------------------------------------------------------------------------------------------------------------------------------------------------------------------------------------------------------------------|
| <b>E. Medical history</b> |                                                                                                                                                                                                                                                        |
| E02                       | <input type="checkbox"/> if female, are you pregnant? <input type="radio"/> no <input type="radio"/> yes<br><input type="checkbox"/> if yes, which week according to USG or LMP:     __ __  week                                                       |
| E03                       | Onset date of the current illness     __ __  /  __ __  /  __ __  (dd/mm/yy)                                                                                                                                                                            |
| E04                       | Was the patient admitted to any hospital in the last 6 months <input type="radio"/> no <input type="radio"/> yes<br><input type="checkbox"/> if yes, how many times?     __ __  times<br><input type="checkbox"/> if yes, specify the reason(s): _____ |
| E05                       | Did the patient seek medical care in the last 6 months (excluding admissions)?<br><input type="checkbox"/> if yes, how many times?     __ __  times<br><input type="checkbox"/> if yes, specify the reason(s): _____                                   |

|                                                                                  |           |                                                                                                                      |                                                                         |                |
|----------------------------------------------------------------------------------|-----------|----------------------------------------------------------------------------------------------------------------------|-------------------------------------------------------------------------|----------------|
|  | Page<br>3 | <input type="checkbox"/> multiple choice<br><input type="radio"/> single choice<br><input type="text"/> alphanumeric | <b>CLEAR</b><br><b>Case Report Form - Enrolment</b><br><b>Community</b> | Visit Bar Code |
|----------------------------------------------------------------------------------|-----------|----------------------------------------------------------------------------------------------------------------------|-------------------------------------------------------------------------|----------------|

| G. Health TODAY                                                                           |                                                                                                                                                                                                                                                                                                                                                                                                                                                          |
|-------------------------------------------------------------------------------------------|----------------------------------------------------------------------------------------------------------------------------------------------------------------------------------------------------------------------------------------------------------------------------------------------------------------------------------------------------------------------------------------------------------------------------------------------------------|
| G01                                                                                       | Was the assessment completed? <input type="radio"/> no <input type="radio"/> yes                                                                                                                                                                                                                                                                                                                                                                         |
| <b>Under each heading, please tick the ONE box that best describes your health TODAY.</b> |                                                                                                                                                                                                                                                                                                                                                                                                                                                          |
| G02                                                                                       | <b>MOBILITY</b><br><input type="radio"/> I have no problems in walking about<br><input type="radio"/> I have slight problems in walking about<br><input type="radio"/> I have moderate problems in walking about<br><input type="radio"/> I have severe problems in walking about<br><input type="radio"/> I am unable to walk about                                                                                                                     |
| G03                                                                                       | <b>USUAL ACTIVITIES (e.g. work, study, housework, family or leisure activities)</b><br><input type="radio"/> I have no problems doing my usual activities<br><input type="radio"/> I have slight problems doing my usual activities<br><input type="radio"/> I have moderate problems doing my usual activities<br><input type="radio"/> I have severe problems doing my usual activities<br><input type="radio"/> I am unable to do my usual activities |
| G04                                                                                       | <b>ANXIETY</b><br><input type="radio"/> I am not anxious<br><input type="radio"/> I am slightly anxious<br><input type="radio"/> I am moderately anxious<br><input type="radio"/> I am severely anxious<br><input type="radio"/> I am extremely anxious                                                                                                                                                                                                  |
| G05                                                                                       | <b>SELF - CARE</b><br><input type="radio"/> I have no problems washing or dressing myself<br><input type="radio"/> I have slight problems washing or dressing myself<br><input type="radio"/> I have moderate problems washing or dressing myself<br><input type="radio"/> I have severe problems washing or dressing myself<br><input type="radio"/> I am unable to wash or dress myself                                                                |
| G06                                                                                       | <b>PAIN / DISCOMFORT</b><br><input type="radio"/> I have no pain or discomfort<br><input type="radio"/> I have slight pain or discomfort<br><input type="radio"/> I have moderate pain or discomfort<br><input type="radio"/> I have severe pain or discomfort<br><input type="radio"/> I have extreme pain or discomfort                                                                                                                                |

| L. Remarks                                                                                                                                                                                                                                                                                                                                                                                                                                                                                                                                                                                                                                                                                                                                                                                                                                                                                                                                                                                                                                                                                                                                                                                                                      |
|---------------------------------------------------------------------------------------------------------------------------------------------------------------------------------------------------------------------------------------------------------------------------------------------------------------------------------------------------------------------------------------------------------------------------------------------------------------------------------------------------------------------------------------------------------------------------------------------------------------------------------------------------------------------------------------------------------------------------------------------------------------------------------------------------------------------------------------------------------------------------------------------------------------------------------------------------------------------------------------------------------------------------------------------------------------------------------------------------------------------------------------------------------------------------------------------------------------------------------|
| <div style="border-bottom: 1px solid black; height: 1.2em; margin-bottom: 5px;"></div> <div style="border-bottom: 1px solid black; height: 1.2em; margin-bottom: 5px;"></div> <div style="border-bottom: 1px solid black; height: 1.2em; margin-bottom: 5px;"></div> <div style="border-bottom: 1px solid black; height: 1.2em; margin-bottom: 5px;"></div> <div style="border-bottom: 1px solid black; height: 1.2em; margin-bottom: 5px;"></div> <div style="border-bottom: 1px solid black; height: 1.2em; margin-bottom: 5px;"></div>                                                                                                                                                                                                                                                                                                                                                                                                                                                                                                                                                                                                                                                                                       |
| <b>M. Responsibilities</b><br><b>Field worker</b> who filled out the questionnaire:<br><div style="display: flex; justify-content: space-between; margin-top: 10px;"> <span>Initials <input type="text"/> <input type="text"/> <input type="text"/></span> <span>Date <input type="text"/> <input type="text"/> <input type="text"/> / <input type="text"/> <input type="text"/> <input type="text"/> (dd/mm/yy)</span> </div> <b>Study Doctor</b> who checked the questionnaire:<br><div style="display: flex; justify-content: space-between; margin-top: 10px;"> <span>Initials <input type="text"/> <input type="text"/> <input type="text"/></span> <span>Date <input type="text"/> <input type="text"/> <input type="text"/> / <input type="text"/> <input type="text"/> <input type="text"/> (dd/mm/yy)</span> </div> <b>Data staff</b> who entered the data in the database:<br><div style="display: flex; justify-content: space-between; margin-top: 10px;"> <span>Initials <input type="text"/> <input type="text"/> <input type="text"/></span> <span>Date <input type="text"/> <input type="text"/> <input type="text"/> / <input type="text"/> <input type="text"/> <input type="text"/> (dd/mm/yy)</span> </div> |

|                                                                                  |           |                                                                                                                                                                             |                                                                                           |                |
|----------------------------------------------------------------------------------|-----------|-----------------------------------------------------------------------------------------------------------------------------------------------------------------------------|-------------------------------------------------------------------------------------------|----------------|
|  | Page<br>1 | <input type="checkbox"/> multiple choice<br><input type="radio"/> single choice<br><input type="text"/> alphanumeric<br><i>Grey sections to be completed by study nurse</i> | <b>CLEAR</b><br><b>Case Report Form - Enrolment</b><br><b>St. Francis Xavier Hospital</b> | Visit Bar Code |
|----------------------------------------------------------------------------------|-----------|-----------------------------------------------------------------------------------------------------------------------------------------------------------------------------|-------------------------------------------------------------------------------------------|----------------|

**A. Identification**

|     |                                                                                                                                                                                                                                                                                                |                      |
|-----|------------------------------------------------------------------------------------------------------------------------------------------------------------------------------------------------------------------------------------------------------------------------------------------------|----------------------|
| A01 | Hospital-ID <input type="text"/> / <input type="text"/> <input type="text"/> <input type="text"/> | <b>Screening ID:</b> |
| A02 | Age <input type="text"/> <input type="text"/> years                                                                                                                                                                                                                                            |                      |
| A03 | Sex <input type="radio"/> male <input type="radio"/> female                                                                                                                                                                                                                                    |                      |
| A04 | Community <input type="text"/>                                                                                                                                                                                                                                                                 |                      |
| A05 | Date of interview <input type="text"/> <input type="text"/> <input type="text"/> / <input type="text"/> <input type="text"/> <input type="text"/> / <input type="text"/> <input type="text"/> <input type="text"/> (dd/mm/yy)                                                                  |                      |
| A06 | Is the patient participating in another study? <input type="radio"/> no <input type="radio"/> yes<br><input type="checkbox"/> if yes, which? <input type="text"/>                                                                                                                              |                      |

**B. General status/Vital signs**

|     |                                                                                                                                                                                                                                                                                                                                                                                         |                                                                                               |  |
|-----|-----------------------------------------------------------------------------------------------------------------------------------------------------------------------------------------------------------------------------------------------------------------------------------------------------------------------------------------------------------------------------------------|-----------------------------------------------------------------------------------------------|--|
| B01 | Weight <input type="text"/> <input type="text"/> <input type="text"/> . <input type="text"/> <input type="text"/> kg                                                                                                                                                                                                                                                                    | Height <input type="text"/> <input type="text"/> <input type="text"/> <input type="text"/> cm |  |
| B02 | Were vital signs collected? <input type="radio"/> no <input type="radio"/> yes <input type="radio"/> NA                                                                                                                                                                                                                                                                                 |                                                                                               |  |
| B03 | Blood Pressure (mmHg): <input type="text"/> <input type="text"/> <input type="text"/> <input type="text"/> / <input type="text"/> <input type="text"/> <input type="text"/> <input type="text"/> <input type="text"/> <input type="radio"/> not done                                                                                                                                    |                                                                                               |  |
| B04 | Temperature (°C): <input type="text"/> <input type="text"/> <input type="text"/> . <input type="text"/> <input type="text"/> <input type="radio"/> Oral <input type="radio"/> Axillary <input type="radio"/> Rectal<br><input type="radio"/> Tympanic <input type="radio"/> Temporal <input type="radio"/> not done                                                                     |                                                                                               |  |
| B05 | Heart Rate: <input type="text"/> <input type="text"/> <input type="text"/> (beats/min) <input type="radio"/> not done                                                                                                                                                                                                                                                                   |                                                                                               |  |
| B06 | Respiratory Rate: <input type="text"/> <input type="text"/> (breath/min) <input type="radio"/> not done                                                                                                                                                                                                                                                                                 |                                                                                               |  |
| B07 | Blood oxygen saturation (SpO2) - resting: <input type="text"/> <input type="text"/> <input type="text"/> % <input type="radio"/> not done<br>Time measurement performed: <input type="text"/> <input type="text"/> <input type="text"/> : <input type="text"/> <input type="text"/> (hh:mm)<br>Assessment done with <input type="radio"/> Room Air <input type="radio"/> Oxygen Therapy |                                                                                               |  |

**C. Previous drugs intake**

|     |                                                                                                                                                                                                                                                                                                                                                                                                                                                                                                                                                                                                       |
|-----|-------------------------------------------------------------------------------------------------------------------------------------------------------------------------------------------------------------------------------------------------------------------------------------------------------------------------------------------------------------------------------------------------------------------------------------------------------------------------------------------------------------------------------------------------------------------------------------------------------|
| C01 | Was medication taken/given in last month? <input type="radio"/> no <input type="radio"/> yes <input type="radio"/> unknown<br><input type="checkbox"/> if yes, what: (please specify all medication names) <div style="margin-top: 5px;"> <input type="checkbox"/> antibiotics <input type="text"/> </div> <div style="margin-top: 5px;"> <input type="checkbox"/> antimalarials: <input type="text"/> </div> <div style="margin-top: 5px;"> <input type="checkbox"/> NSAIDs: <input type="text"/> </div> <div style="margin-top: 5px;"> <input type="checkbox"/> others: <input type="text"/> </div> |
|-----|-------------------------------------------------------------------------------------------------------------------------------------------------------------------------------------------------------------------------------------------------------------------------------------------------------------------------------------------------------------------------------------------------------------------------------------------------------------------------------------------------------------------------------------------------------------------------------------------------------|

**D. Immunization check**

|     |                                                                                                                                                                                                                                                                                                                                                                                                                                                                                                                                                                                                                                                                                                                                                                                                                                                                                                                                                                                                                                                                                                                                                                                                                                                                                                                                                                                                                                                                                                                                                                                                                                                                                                                                                                                                                              |
|-----|------------------------------------------------------------------------------------------------------------------------------------------------------------------------------------------------------------------------------------------------------------------------------------------------------------------------------------------------------------------------------------------------------------------------------------------------------------------------------------------------------------------------------------------------------------------------------------------------------------------------------------------------------------------------------------------------------------------------------------------------------------------------------------------------------------------------------------------------------------------------------------------------------------------------------------------------------------------------------------------------------------------------------------------------------------------------------------------------------------------------------------------------------------------------------------------------------------------------------------------------------------------------------------------------------------------------------------------------------------------------------------------------------------------------------------------------------------------------------------------------------------------------------------------------------------------------------------------------------------------------------------------------------------------------------------------------------------------------------------------------------------------------------------------------------------------------------|
| D01 | Did the patient receive a Covid-19 vaccine <input type="radio"/> no <input type="radio"/> yes <input type="radio"/> unknown<br><input type="checkbox"/> if yes: Number of doses received: <input type="text"/>                                                                                                                                                                                                                                                                                                                                                                                                                                                                                                                                                                                                                                                                                                                                                                                                                                                                                                                                                                                                                                                                                                                                                                                                                                                                                                                                                                                                                                                                                                                                                                                                               |
| D02 | COVID-19 vaccine <u>dose 1</u> :<br>Product name:<br><input type="radio"/> Sputnik <input type="radio"/> Pfizer-BioNTech <input type="radio"/> AstraZeneca <input type="radio"/> Janssen <input type="radio"/> Novavax<br><input type="radio"/> Covishield <input type="radio"/> Other: <input type="text"/> <input type="radio"/> Unknown<br>Date: <input type="text"/> <input type="text"/> <input type="text"/> / <input type="text"/> <input type="text"/> <input type="text"/> / <input type="text"/> <input type="text"/> <input type="text"/> (dd/mm/yy)<br>COVID-19 vaccine <u>dose 2</u> :<br>Product name:<br><input type="radio"/> Sputnik <input type="radio"/> Pfizer-BioNTech <input type="radio"/> AstraZeneca <input type="radio"/> Janssen <input type="radio"/> Novavax<br><input type="radio"/> Covishield <input type="radio"/> Other: <input type="text"/> <input type="radio"/> Unknown<br>Date: <input type="text"/> <input type="text"/> <input type="text"/> / <input type="text"/> <input type="text"/> <input type="text"/> / <input type="text"/> <input type="text"/> <input type="text"/> (dd/mm/yy)<br>COVID-19 vaccine <u>dose 3</u> :<br>Product name:<br><input type="radio"/> Sputnik <input type="radio"/> Pfizer-BioNTech <input type="radio"/> AstraZeneca <input type="radio"/> Janssen <input type="radio"/> Novavax<br><input type="radio"/> Covishield <input type="radio"/> Other: <input type="text"/> <input type="radio"/> Unknown<br>Date: <input type="text"/> <input type="text"/> <input type="text"/> / <input type="text"/> <input type="text"/> <input type="text"/> / <input type="text"/> <input type="text"/> <input type="text"/> (dd/mm/yy)<br><input type="checkbox"/> If more than 3 doses: Please enter the Product name and date of further vaccinations here: |
| D03 | Source of information:<br><input type="radio"/> documented evidence (Vaccine card/vaccine passport/facility-based record/other)<br><input type="radio"/> recall                                                                                                                                                                                                                                                                                                                                                                                                                                                                                                                                                                                                                                                                                                                                                                                                                                                                                                                                                                                                                                                                                                                                                                                                                                                                                                                                                                                                                                                                                                                                                                                                                                                              |

**E. Medical history: SARS-CoV-2 Infection**

|       |                                                                                                                                                                                                                                                                                                                                                                                                                                                                                                        |                                                                                                                                                                                                                                                                |                                                                                                                                                                                                                                                                                                                                                                                                                                        |
|-------|--------------------------------------------------------------------------------------------------------------------------------------------------------------------------------------------------------------------------------------------------------------------------------------------------------------------------------------------------------------------------------------------------------------------------------------------------------------------------------------------------------|----------------------------------------------------------------------------------------------------------------------------------------------------------------------------------------------------------------------------------------------------------------|----------------------------------------------------------------------------------------------------------------------------------------------------------------------------------------------------------------------------------------------------------------------------------------------------------------------------------------------------------------------------------------------------------------------------------------|
| E01   | Has the participant been infected / ill with SARS-CoV-2 / COVID-19 previously?<br><div style="text-align: right;"> <input type="radio"/> no    <input type="radio"/> yes    <input type="radio"/> unknown         </div> <input type="checkbox"/> if yes, how many times? <span style="border-bottom: 1px solid black; display: inline-block; width: 20px; height: 15px;"></span> times<br><input type="checkbox"/> if yes, please answer the following questions (one row for each single infection): |                                                                                                                                                                                                                                                                |                                                                                                                                                                                                                                                                                                                                                                                                                                        |
|       | How many months ago?                                                                                                                                                                                                                                                                                                                                                                                                                                                                                   | What is the highest level of care received?                                                                                                                                                                                                                    | How was your infection/illness confirmed?                                                                                                                                                                                                                                                                                                                                                                                              |
| E01.1 | <input type="radio"/> <1<br><input type="radio"/> 1-<3<br><input type="radio"/> 3-<6<br><input type="radio"/> 6-<12<br><input type="radio"/> ≥12<br><input type="radio"/> can't recall                                                                                                                                                                                                                                                                                                                 | <input type="radio"/> Admitted to the hospital<br><input type="radio"/> Self-care/Over the counter<br><input type="radio"/> Outpatient<br><input type="radio"/> Telemedicine<br><input type="radio"/> Community facility/CHPS<br><input type="radio"/> Unknown | <input type="checkbox"/> Nose &/ throat swab test<br><input type="checkbox"/> Symptoms assessed by a doctor<br><input type="checkbox"/> Blood sample<br><input type="checkbox"/> Symptoms assessed by a non-medical professional (pharmacist, traditional healer, family member)<br><input type="checkbox"/> Self-suspicion due to contact with a suspected/confirmed covid-19 case<br><input type="checkbox"/> Other, please specify: |
| E01.2 | <input type="radio"/> <1<br><input type="radio"/> 1-<3<br><input type="radio"/> 3-<6<br><input type="radio"/> 6-<12<br><input type="radio"/> ≥12<br><input type="radio"/> can't recall                                                                                                                                                                                                                                                                                                                 | <input type="radio"/> Admitted to the hospital<br><input type="radio"/> Self-care/Over the counter<br><input type="radio"/> Outpatient<br><input type="radio"/> Telemedicine<br><input type="radio"/> Community facility/CHPS<br><input type="radio"/> Unknown | <input type="checkbox"/> Nose &/ throat swab test<br><input type="checkbox"/> Symptoms assessed by a doctor<br><input type="checkbox"/> Blood sample<br><input type="checkbox"/> Symptoms assessed by a non-medical professional (pharmacist, traditional healer, family member)<br><input type="checkbox"/> self-suspicion due to contact with a suspected/confirmed covid-19 case<br><input type="checkbox"/> Other, please specify: |
| E01.3 | <input type="radio"/> <1<br><input type="radio"/> 1-<3<br><input type="radio"/> 3-<6<br><input type="radio"/> 6-<12<br><input type="radio"/> ≥12<br><input type="radio"/> can't recall                                                                                                                                                                                                                                                                                                                 | <input type="radio"/> Admitted to the hospital<br><input type="radio"/> Self-care/Over the counter<br><input type="radio"/> Outpatient<br><input type="radio"/> Telemedicine<br><input type="radio"/> Community facility/CHPS<br><input type="radio"/> Unknown | <input type="checkbox"/> Nose &/ throat swab test<br><input type="checkbox"/> Symptoms assessed by a doctor<br><input type="checkbox"/> Blood sample<br><input type="checkbox"/> Symptoms assessed by a non-medical professional (pharmacist, traditional healer, family member)<br><input type="checkbox"/> self-suspicion due to contact with a suspected/confirmed covid-19 case<br><input type="checkbox"/> Other, please specify: |
| E01.4 |                                                                                                                                                                                                                                                                                                                                                                                                                                                                                                        |                                                                                                                                                                                                                                                                |                                                                                                                                                                                                                                                                                                                                                                                                                                        |
| E01.5 |                                                                                                                                                                                                                                                                                                                                                                                                                                                                                                        |                                                                                                                                                                                                                                                                |                                                                                                                                                                                                                                                                                                                                                                                                                                        |

|                                                                                  |           |                                                                                                                                                                                                                                                                                                                               |                                                                                           |                |
|----------------------------------------------------------------------------------|-----------|-------------------------------------------------------------------------------------------------------------------------------------------------------------------------------------------------------------------------------------------------------------------------------------------------------------------------------|-------------------------------------------------------------------------------------------|----------------|
|  | Page<br>3 | <div style="display: flex; align-items: center;"> <div style="margin-right: 10px;"> <input type="checkbox"/> multiple choice<br/> <input type="radio"/> single choice<br/> <input type="text"/> alphanumeric         </div> <div style="font-size: small;"> <i>Grey sections to be completed by study nurse</i> </div> </div> | <b>CLEAR</b><br><b>Case Report Form - Enrolment</b><br><b>St. Francis Xavier Hospital</b> | Visit Bar Code |
|----------------------------------------------------------------------------------|-----------|-------------------------------------------------------------------------------------------------------------------------------------------------------------------------------------------------------------------------------------------------------------------------------------------------------------------------------|-------------------------------------------------------------------------------------------|----------------|

**E. Medical history: Others**

|     |                                                                                                                                                                                                                                                                                                                                                          |
|-----|----------------------------------------------------------------------------------------------------------------------------------------------------------------------------------------------------------------------------------------------------------------------------------------------------------------------------------------------------------|
| E02 | <input type="checkbox"/> <i>if female</i> , are you pregnant? <span style="float: right;"><input type="radio"/> no <input type="radio"/> yes</span><br><input type="checkbox"/> <i>if yes</i> , which week according to USG or LMP: <span style="float: right;"> _ _  week</span>                                                                        |
| E03 | Onset date of the current illness     _ _  /  _ _  /  _ _  (dd/mm/yy)                                                                                                                                                                                                                                                                                    |
| E04 | Was the patient admitted to any hospital in the last 6 months <span style="float: right;"><input type="radio"/> no <input type="radio"/> yes</span><br><input type="checkbox"/> <i>if yes</i> , how many times? <span style="float: right;"> _ _  times</span><br><input type="checkbox"/> <i>if yes</i> , specify the reason(s): _____                  |
| E05 | Did the patient seek medical care in the last 6 months (excluding admissions)? <span style="float: right;"><input type="radio"/> no <input type="radio"/> yes</span><br><input type="checkbox"/> <i>if yes</i> , how many times? <span style="float: right;"> _ _  times</span><br><input type="checkbox"/> <i>if yes</i> , specify the reason(s): _____ |

**F. Comorbidities**

| No.                                                      | Comorbidities                                                                                                | Experienced           | Year started  | Severity              |
|----------------------------------------------------------|--------------------------------------------------------------------------------------------------------------|-----------------------|---------------|-----------------------|
|                                                          |                                                                                                              |                       | (yyyy)        | not                   |
| <i>F01 Cardiovascular disease and metabolic disorder</i> |                                                                                                              |                       |               |                       |
| F01a                                                     | Hypertension                                                                                                 | <input type="radio"/> | _ _ _ _ _ _ _ | <input type="radio"/> |
| F01b                                                     | Coronary artery disease                                                                                      | <input type="radio"/> | _ _ _ _ _ _ _ | <input type="radio"/> |
| F01c                                                     | Heart failure                                                                                                | <input type="radio"/> | _ _ _ _ _ _ _ | <input type="radio"/> |
| F01d                                                     | Congenital heart disease                                                                                     | <input type="radio"/> | _ _ _ _ _ _ _ | <input type="radio"/> |
| F01e                                                     | Acquired Cardiomyopathy (e.g. prolonged QT- interval, QT arrythmia, heart failure, MI, bradycardia < 50 bpm) | <input type="radio"/> | _ _ _ _ _ _ _ | <input type="radio"/> |
| F01f                                                     | Stroke                                                                                                       | <input type="radio"/> | _ _ _ _ _ _ _ | <input type="radio"/> |
| F01g                                                     | Prior Heart Surgery                                                                                          | <input type="radio"/> | _ _ _ _ _ _ _ | <input type="radio"/> |
| F01h                                                     | Pulmonary hypertension                                                                                       | <input type="radio"/> | _ _ _ _ _ _ _ | <input type="radio"/> |
| F01i                                                     | Diabetes Mellitus (type 1)                                                                                   | <input type="radio"/> | _ _ _ _ _ _ _ | <input type="radio"/> |
| F01j                                                     | Diabetes Mellitus (type 2)                                                                                   | <input type="radio"/> | _ _ _ _ _ _ _ | <input type="radio"/> |
| F01k                                                     | Diabetes Mellitus (gestational)                                                                              | <input type="radio"/> | _ _ _ _ _ _ _ | <input type="radio"/> |
| F01l                                                     | Micro angiopathy                                                                                             | <input type="radio"/> | _ _ _ _ _ _ _ | <input type="radio"/> |
| F01m                                                     | Macro-angiopathy                                                                                             | <input type="radio"/> | _ _ _ _ _ _ _ | <input type="radio"/> |
| <i>F02 Respiratory disorder</i>                          |                                                                                                              |                       |               |                       |
| F02a                                                     | Asthma                                                                                                       | <input type="radio"/> | _ _ _ _ _ _ _ | <input type="radio"/> |
| F02b                                                     | Cystic fibrosis                                                                                              | <input type="radio"/> | _ _ _ _ _ _ _ | <input type="radio"/> |
| F02c                                                     | COPD                                                                                                         | <input type="radio"/> | _ _ _ _ _ _ _ | <input type="radio"/> |
| F02d                                                     | Emphysema                                                                                                    | <input type="radio"/> | _ _ _ _ _ _ _ | <input type="radio"/> |
| F02e                                                     | Chronic bronchitis                                                                                           | <input type="radio"/> | _ _ _ _ _ _ _ | <input type="radio"/> |

|                                                                                  |           |                                                                                                                                                                                                                                                                                                                                                    |                                                                                           |                |
|----------------------------------------------------------------------------------|-----------|----------------------------------------------------------------------------------------------------------------------------------------------------------------------------------------------------------------------------------------------------------------------------------------------------------------------------------------------------|-------------------------------------------------------------------------------------------|----------------|
|  | Page<br>4 | <div style="display: flex; align-items: center;"> <div style="margin-right: 10px;"> <input type="checkbox"/><br/> <input type="radio"/><br/> <input type="checkbox"/> </div> <div>             multiple choice<br/>             single choice<br/>             alphanumeric<br/> <i>Grey sections to be completed by study nurse</i> </div> </div> | <b>CLEAR</b><br><b>Case Report Form - Enrolment</b><br><b>St. Francis Xavier Hospital</b> | Visit Bar Code |
|----------------------------------------------------------------------------------|-----------|----------------------------------------------------------------------------------------------------------------------------------------------------------------------------------------------------------------------------------------------------------------------------------------------------------------------------------------------------|-------------------------------------------------------------------------------------------|----------------|

**F. Comorbidities**

| No.                                            | Comorbidities                                                  | Experienced           | Year started          | Severity              |
|------------------------------------------------|----------------------------------------------------------------|-----------------------|-----------------------|-----------------------|
| F03 Renal disorder                             |                                                                |                       |                       |                       |
| F03a                                           | Renal disease with dialysis                                    | <input type="radio"/> | <input type="radio"/> | <input type="radio"/> |
| F03b                                           | Renal disease without dialysis                                 | <input type="radio"/> | <input type="radio"/> | <input type="radio"/> |
| F04 Genetic disease and other severe illnesses |                                                                |                       |                       |                       |
| F04a                                           | Sickle cell disease                                            | <input type="radio"/> | <input type="radio"/> | <input type="radio"/> |
| F04b                                           | Thalassemia                                                    | <input type="radio"/> | <input type="radio"/> | <input type="radio"/> |
| F04c                                           | Metastatic cancer                                              | <input type="radio"/> | <input type="radio"/> | <input type="radio"/> |
| F04d                                           | Haematopoietic stem cell transplantation                       | <input type="radio"/> | <input type="radio"/> | <input type="radio"/> |
| F04e                                           | Cirrhosis                                                      | <input type="radio"/> | <input type="radio"/> | <input type="radio"/> |
| F04f                                           | Cancer chemotherapy                                            | <input type="radio"/> | <input type="radio"/> | <input type="radio"/> |
| F04g                                           | Immunosuppressive treatment (biotherapy and/or corticosteroid) | <input type="radio"/> | <input type="radio"/> | <input type="radio"/> |
| F04h                                           | Uncontrolled HIV or known CD4 < 200/mm3                        | <input type="radio"/> | <input type="radio"/> | <input type="radio"/> |
| F05 Other, please specify                      |                                                                |                       |                       |                       |
| F05a                                           |                                                                | <input type="radio"/> | <input type="radio"/> | <input type="radio"/> |
| F05b                                           |                                                                | <input type="radio"/> | <input type="radio"/> | <input type="radio"/> |
| F05c                                           |                                                                | <input type="radio"/> | <input type="radio"/> | <input type="radio"/> |

**G. Health before illness**

|                                                                                                         |                                                                                                                                                                                                                                                                                                                                                                                                                                                       |
|---------------------------------------------------------------------------------------------------------|-------------------------------------------------------------------------------------------------------------------------------------------------------------------------------------------------------------------------------------------------------------------------------------------------------------------------------------------------------------------------------------------------------------------------------------------------------|
| G01                                                                                                     | Was the assessment completed? <input type="radio"/> no <input type="radio"/> yes                                                                                                                                                                                                                                                                                                                                                                      |
| <b>Under each heading, please tick the ONE box that best describes your health before your illness.</b> |                                                                                                                                                                                                                                                                                                                                                                                                                                                       |
| G02                                                                                                     | <b>MOBILITY</b><br><input type="radio"/> I had no problems in walking about<br><input type="radio"/> I had slight problems in walking about<br><input type="radio"/> I had moderate problems in walking about<br><input type="radio"/> I had severe problems in walking about<br><input type="radio"/> I was unable to walk about                                                                                                                     |
| G03                                                                                                     | <b>USUAL ACTIVITIES (e.g. work, study, housework, family or leisure activities)</b><br><input type="radio"/> I had no problems doing my usual activities<br><input type="radio"/> I had slight problems doing my usual activities<br><input type="radio"/> I had moderate problems doing my usual activities<br><input type="radio"/> I had severe problems doing my usual activities<br><input type="radio"/> I was unable to do my usual activities |
| G04                                                                                                     | <b>ANXIETY</b><br><input type="radio"/> I was not anxious<br><input type="radio"/> I was slightly anxious<br><input type="radio"/> I was moderately anxious<br><input type="radio"/> I was severely anxious<br><input type="radio"/> I was extremely anxious                                                                                                                                                                                          |
| G05                                                                                                     | <b>SELF-CARE</b><br><input type="radio"/> I had no problems washing or dressing myself<br><input type="radio"/> I had slight problems washing or dressing myself<br><input type="radio"/> I had moderate problems washing or dressing myself<br><input type="radio"/> I had severe problems washing or dressing myself<br><input type="radio"/> I was unable to wash or dress myself                                                                  |
| G06                                                                                                     | <b>PAIN / DISCOMFORT</b><br><input type="radio"/> I had no pain or discomfort<br><input type="radio"/> I had slight pain or discomfort<br><input type="radio"/> I had moderate pain or discomfort<br><input type="radio"/> I had severe pain or discomfort<br><input type="radio"/> I had extreme pain or discomfort                                                                                                                                  |

|                                                                                  |           |                                                                                                                                                                                                                                                                                                     |                                                                                           |                |
|----------------------------------------------------------------------------------|-----------|-----------------------------------------------------------------------------------------------------------------------------------------------------------------------------------------------------------------------------------------------------------------------------------------------------|-------------------------------------------------------------------------------------------|----------------|
|  | Page<br>5 | <div style="display: flex; align-items: center;"> <div style="margin-right: 10px;"> <input type="checkbox"/> multiple choice<br/> <input type="radio"/> single choice<br/> <input type="text"/> alphanumeric         </div> <div> <i>Grey sections to be completed by study nurse</i> </div> </div> | <b>CLEAR</b><br><b>Case Report Form - Enrolment</b><br><b>St. Francis Xavier Hospital</b> | Visit Bar Code |
|----------------------------------------------------------------------------------|-----------|-----------------------------------------------------------------------------------------------------------------------------------------------------------------------------------------------------------------------------------------------------------------------------------------------------|-------------------------------------------------------------------------------------------|----------------|

| H. Respiratory Symptoms |                                                                                  |                                                                                   |                             |
|-------------------------|----------------------------------------------------------------------------------|-----------------------------------------------------------------------------------|-----------------------------|
| H01                     | Was the assessment completed? <input type="radio"/> no <input type="radio"/> yes |                                                                                   |                             |
| H02                     | Assessment date:  _ _  /  _ _  /  _ _  (dd/mm/yy)                                |                                                                                   |                             |
|                         | Symptoms                                                                         | Status                                                                            | Onset of symptom (dd/mm/yy) |
| H03                     | Fever                                                                            | <input type="radio"/> no <input type="radio"/> yes <input type="radio"/> not done | _ _ / _ _ / _ _             |
| H04                     | Cough                                                                            | <input type="radio"/> no <input type="radio"/> yes <input type="radio"/> not done | _ _ / _ _ / _ _             |
| H05                     | Shortness of breath                                                              | <input type="radio"/> no <input type="radio"/> yes <input type="radio"/> not done | _ _ / _ _ / _ _             |
| H06                     | Sore throat                                                                      | <input type="radio"/> no <input type="radio"/> yes <input type="radio"/> not done | _ _ / _ _ / _ _             |
| H07                     | Runny nose (Rhinorrhoea)                                                         | <input type="radio"/> no <input type="radio"/> yes <input type="radio"/> not done | _ _ / _ _ / _ _             |
| H08                     | Loss of smell (Anosmia)                                                          | <input type="radio"/> no <input type="radio"/> yes <input type="radio"/> not done | _ _ / _ _ / _ _             |
| H09                     | Loss of taste (Ageusia)                                                          | <input type="radio"/> no <input type="radio"/> yes <input type="radio"/> not done | _ _ / _ _ / _ _             |
| H10                     | Muscle aches (Myalgia)                                                           | <input type="radio"/> no <input type="radio"/> yes <input type="radio"/> not done | _ _ / _ _ / _ _             |
| H11                     | Diarrhoea                                                                        | <input type="radio"/> no <input type="radio"/> yes <input type="radio"/> not done | _ _ / _ _ / _ _             |
| H12                     | Vomiting / Nausea                                                                | <input type="radio"/> no <input type="radio"/> yes <input type="radio"/> not done | _ _ / _ _ / _ _             |
| H13                     | Headache                                                                         | <input type="radio"/> no <input type="radio"/> yes <input type="radio"/> not done | _ _ / _ _ / _ _             |
| H14                     | Fatigue / Malaise                                                                | <input type="radio"/> no <input type="radio"/> yes <input type="radio"/> not done | _ _ / _ _ / _ _             |
| H15                     | Skin rash                                                                        | <input type="radio"/> no <input type="radio"/> yes <input type="radio"/> not done | _ _ / _ _ / _ _             |
| H16                     | Conjunctivitis                                                                   | <input type="radio"/> no <input type="radio"/> yes <input type="radio"/> not done | _ _ / _ _ / _ _             |
| H17                     | Others, please specify:                                                          |                                                                                   | _ _ / _ _ / _ _             |

| I. Ventilation |                                                                                                                                                                            |                                                       |                                                       |
|----------------|----------------------------------------------------------------------------------------------------------------------------------------------------------------------------|-------------------------------------------------------|-------------------------------------------------------|
| I01            | <input type="checkbox"/> if H05 'Shortness of breath' =yes.<br>Was the mMRC DYSPNEA completed? <input type="radio"/> no <input type="radio"/> yes <input type="radio"/> NA |                                                       |                                                       |
| I02            | <b>I am now asking you about your respiration:</b><br>[mMRC dyspnea grade]<br><b>How would you rate your respiration?</b><br><b>Would you say, ...</b>                     | ...<br>before<br>acute<br>illness<br>?                | ...<br>Today?                                         |
| I03            | ... 'I only get breathless on strenuous exercise'?                                                                                                                         | <input type="radio"/> no<br><input type="radio"/> yes | <input type="radio"/> no<br><input type="radio"/> yes |
| I04            | ... 'I get short of breath when hurrying on level ground or walking up a slight hill'?                                                                                     | <input type="radio"/> no<br><input type="radio"/> yes | <input type="radio"/> no<br><input type="radio"/> yes |
| I05            | ... 'On level ground, I walk slower than other people the same age because of breathlessness or I have to stop for breath when walking at my own pace'?                    | <input type="radio"/> no<br><input type="radio"/> yes | <input type="radio"/> no<br><input type="radio"/> yes |
| I06            | ... 'I stop for breath after walking 100m or after a few minutes on level ground'?                                                                                         | <input type="radio"/> no<br><input type="radio"/> yes | <input type="radio"/> no<br><input type="radio"/> yes |
| I07            | ... 'I am too breathless to leave the house or I am breathless when dressing'?                                                                                             | <input type="radio"/> no<br><input type="radio"/> yes | <input type="radio"/> no<br><input type="radio"/> yes |

| J. Suspected diagnoses (on admission/OPD) |                                                                                                                                                                                                                                                                      |
|-------------------------------------------|----------------------------------------------------------------------------------------------------------------------------------------------------------------------------------------------------------------------------------------------------------------------|
| J01                                       | Does the patient have COVID-19? <input type="radio"/> no <input type="radio"/> yes <input type="radio"/> unknown<br><input type="checkbox"/> if yes, severity: <input type="radio"/> mild <input type="radio"/> moderate <input type="radio"/> severe                |
| J02                                       | Does the patient have another infection diagnosed? <input type="radio"/> no <input type="radio"/> yes <input type="radio"/> unknown<br><input type="checkbox"/> if yes, which?: _____                                                                                |
| J03                                       | Does the patient have suspected malaria? <input type="radio"/> no <input type="radio"/> yes <input type="radio"/> unknown<br><input type="checkbox"/> if yes, is it severe malaria? <input type="radio"/> no <input type="radio"/> yes <input type="radio"/> unknown |
| J04                                       | Result of SARS CoV 2 <b>PCR (not biofire)</b> <input type="radio"/> positive <input type="radio"/> negative <input type="radio"/> NA                                                                                                                                 |
| J05                                       | Other suspected diagnosis:<br>_____<br>_____<br>_____                                                                                                                                                                                                                |



|                                                                                  |           |                                                                                                                                                                                           |                                                                                           |                |
|----------------------------------------------------------------------------------|-----------|-------------------------------------------------------------------------------------------------------------------------------------------------------------------------------------------|-------------------------------------------------------------------------------------------|----------------|
|  | Page<br>6 | <div> <input type="checkbox"/> multiple choice<br/> <input type="radio"/> single choice<br/> <input type="text"/> alphanumeric </div> <i>Grey sections to be completed by study nurse</i> | <b>CLEAR</b><br><b>Case Report Form - Enrolment</b><br><b>St. Francis Xavier Hospital</b> | Visit Bar Code |
|----------------------------------------------------------------------------------|-----------|-------------------------------------------------------------------------------------------------------------------------------------------------------------------------------------------|-------------------------------------------------------------------------------------------|----------------|

***[If the patient was admitted to the hospital, please fill in the hospitalisation form and follow up until discharge]***

#### L. Remarks

#### M. Responsibilities

**Study nurse** who filled in the D0 questionnaire:

Initials         Date    /    /   (dd/mm/yy)

**Doctor** who filled in the D0 questionnaire:

Initials         Date    /    /   (dd/mm/yy)

**Study nurse/ staff** who performed the bedside tests:

Initials         Date    /    /   (dd/mm/yy)

**Study Doctor** who checked the questionnaire:

Initials         Date    /    /   (dd/mm/yy)

**Data staff** who entered the data in the database:

Initials         Date    /    /   (dd/mm/yy)

**Data review** who reviewed the data in the database:

Initials         Date    /    /   (dd/mm/yy)

|                                                                                  |           |                                                                                                     |                                                            |                                                    |
|----------------------------------------------------------------------------------|-----------|-----------------------------------------------------------------------------------------------------|------------------------------------------------------------|----------------------------------------------------|
|  | Page<br>1 | <b>CLEAR</b><br><b>Case Report Form – Recruitment Review</b><br><b>Community – Healthy controls</b> | Participant ID<br> _ _ _ _ -<br> _ _ _ _ _ _ _ <br>- _ _ _ | Screening ID<br> _ _ _ _ - _ _ _ _ -<br> _ _ _ _ _ |
|----------------------------------------------------------------------------------|-----------|-----------------------------------------------------------------------------------------------------|------------------------------------------------------------|----------------------------------------------------|

**Inclusion criteria**

|                                                                                                   |                                                    |                                                 |
|---------------------------------------------------------------------------------------------------|----------------------------------------------------|-------------------------------------------------|
| Patient 16 years old or older?                                                                    | <input type="radio"/> no <input type="radio"/> yes | <input type="checkbox"/> <i>if NO</i> EXCLUSION |
| Does the patient come from the catchment area AND is likely available during the whole follow up? | <input type="radio"/> no <input type="radio"/> yes | <input type="checkbox"/> <i>if NO</i> EXCLUSION |
| Healthy individual (according to pre-screening sheet)                                             | <input type="radio"/> no <input type="radio"/> yes | <input type="checkbox"/> <i>if NO</i> EXCLUSION |
| Informed consent given?                                                                           | <input type="radio"/> no <input type="radio"/> yes | <input type="checkbox"/> <i>if NO</i> EXCLUSION |

**Screening of healthy participants**

|                                                                |                                                                                                   |                                                                                                                                                               |
|----------------------------------------------------------------|---------------------------------------------------------------------------------------------------|---------------------------------------------------------------------------------------------------------------------------------------------------------------|
| <b>Date of screening:</b>  _ _ _ _ / _ _ _ / _ _ _  (dd/mm/yy) |                                                                                                   |                                                                                                                                                               |
| Nasal swab taken?                                              | <input type="radio"/> yes <input type="radio"/> no                                                | <input type="checkbox"/> <i>Ag-RDT</i>                                                                                                                        |
| <b>Ag-RDT Test result:</b>                                     | <input type="radio"/> positive <input type="radio"/> negative <input type="radio"/> invalid       |                                                                                                                                                               |
| Finger prick taken?                                            | <input type="radio"/> yes <input type="radio"/> no                                                | <input type="checkbox"/> <i>IgG-RDT, IgM-RDT</i>                                                                                                              |
| <b>IgG-RDT Test result:</b>                                    | <input type="radio"/> positive <input type="radio"/> negative <input type="radio"/> invalid       |                                                                                                                                                               |
| <b>IgM-RDT Test result:</b>                                    | <input type="radio"/> positive <input type="radio"/> negative <input type="radio"/> invalid       |                                                                                                                                                               |
| Ag-RDT (-) AND IgG-RDT (-) AND IgM-RDT (-)                     | <input type="radio"/> <b>SERONEGATIVE (HEALTHY)</b>                                               |                                                                                                                                                               |
| Ag-RDT (-) AND IgG-RDT (+) AND IgM-RDT (-)                     | <input type="radio"/> <b>SEROPOSITIVE (HEALTHY)</b>                                               |                                                                                                                                                               |
| Ag-RDT (+) OR IgM-RDT (+)                                      | <input type="radio"/> <b>PERFORM MALARIA RDT</b>                                                  |                                                                                                                                                               |
| Finger prick for Malaria?                                      | <input type="radio"/> yes <input type="radio"/> no                                                | <input type="checkbox"/> <i>Mal-RDT</i>                                                                                                                       |
| <b>Mal-RDT result:</b>                                         | <input type="radio"/> positive<br><input type="radio"/> negative<br><input type="radio"/> invalid | <input type="checkbox"/> <b>CO-INFECTION COHORT</b><br><input type="checkbox"/> <b>SCREENING FAILURE</b><br><input type="checkbox"/> <b>SCREENING FAILURE</b> |

**Inclusion HEALTHY CONTROL**

|                                                                       |                                         |
|-----------------------------------------------------------------------|-----------------------------------------|
| Please allocate a Participant ID and stick the label into the header! | _ _ _ _ -<br> _ _ _ _ _ _ _ <br>- _ _ _ |
| <b>Participant ID of matching seropositive CASE</b>                   |                                         |

**Enrolment HEALTHY CONTROL**

| Study flow         |                                                                                             |                                                                                                                                   |
|--------------------|---------------------------------------------------------------------------------------------|-----------------------------------------------------------------------------------------------------------------------------------|
| <b>D0</b>          | Recruitment                                                                                 | 05_02_CLEAR_D0_CRF_Healthy<br>05_10_CLEAR_Schedule                                                                                |
| <b>M1, M6, M13</b> | Household visits: collection of Heparin blood for ELISA<br>Socioeconomic Questionnaire (M1) | 05_07_CLEAR_FU_MonthlyTImodule1<br>05_08_CLEAR_FU_MonthlyTImodule2<br>05_06_CLEAR_CRF_SEP_HHvisit<br>05_09_CLEAR_FU_MedicationUse |
| <b>M2-M12\M6</b>   | Monthly telephone interview                                                                 | 05_07_CLEAR_FU_MonthlyTImodule1<br>05_08_CLEAR_FU_MonthlyTImodule2<br>05_09_CLEAR_FU_MedicationUse                                |
| END OF FOLLOW UP   |                                                                                             |                                                                                                                                   |

|                                                                                  |           |                                                                                              |                                                            |                                                            |
|----------------------------------------------------------------------------------|-----------|----------------------------------------------------------------------------------------------|------------------------------------------------------------|------------------------------------------------------------|
|  | Page<br>2 | <b>CLEAR</b><br><b>Case Report Form – Recruitment Review</b><br>Community – Healthy controls | Participant ID<br> _ _ _ _ -<br> _ _ _ _ _ _ _ <br>- _ _ _ | Screening ID<br> _ _ _ _ _ - _ _ _ _ _ -<br> _ _ _ _ _ _ _ |
|----------------------------------------------------------------------------------|-----------|----------------------------------------------------------------------------------------------|------------------------------------------------------------|------------------------------------------------------------|

**Co-Infection Cohort (reallocation of participant)**

|                                                                                      |                                                                                                                                                                        |
|--------------------------------------------------------------------------------------|------------------------------------------------------------------------------------------------------------------------------------------------------------------------|
| Is the participant reporting Covid-like symptoms (at any time during the follow up)? |                                                                                                                                                                        |
| <input type="radio"/> yes <input type="radio"/> no                                   |                                                                                                                                                                        |
| Date:                                                                                | _ _ _ / _ _ _ / _ _ _  (dd/mm/yy)                                                                                                                                      |
| <b>Samples taken</b>                                                                 |                                                                                                                                                                        |
| Nasal swab taken?                                                                    | <input type="radio"/> yes <input type="radio"/> no <input type="checkbox"/> Ag-RDT                                                                                     |
| Ag-RDT result                                                                        | <input type="radio"/> positive <input type="checkbox"/> <b>PERFORM MALARIA RDT</b><br><input type="radio"/> negative <input type="checkbox"/> <b>REGULAR FOLLOW-UP</b> |

**Screening for Co-Infection Cohort**

|                           |                                                                                                                                                                        |
|---------------------------|------------------------------------------------------------------------------------------------------------------------------------------------------------------------|
| Finger prick for Malaria? | <input type="radio"/> yes <input type="radio"/> no <input type="checkbox"/> Mal-RDT                                                                                    |
| Mal-RDT result:           | <input type="radio"/> positive <input type="checkbox"/> <b>CO-INFECTION COHORT</b><br><input type="radio"/> negative <input type="checkbox"/> <b>REGULAR FOLLOW-UP</b> |

**Enrolment Co-Infection cohort**

|                                                                                                                    |                                                                                            |                                                                                                                                      |
|--------------------------------------------------------------------------------------------------------------------|--------------------------------------------------------------------------------------------|--------------------------------------------------------------------------------------------------------------------------------------|
| <b>In case the participant was a healthy control before, please enrol the person again:</b>                        |                                                                                            |                                                                                                                                      |
| <input type="checkbox"/> <i>only if formerly control:</i><br>Please allocate a new<br>Screening and Participant ID | Screening ID<br> _ _ _ _ _ - _ _ _ _ _ -<br> _ _ _ _ _ _ _                                 | Participant ID<br> _ _ _ _ _ -<br> _ _ _ _ _ _ _ <br>- _ _ _ _                                                                       |
| <b>Samples taken</b>                                                                                               |                                                                                            |                                                                                                                                      |
| EDTA blood taken                                                                                                   | <input type="radio"/> yes <input type="radio"/> no                                         |                                                                                                                                      |
| Heparin blood taken                                                                                                | <input type="radio"/> yes <input type="radio"/> no                                         |                                                                                                                                      |
| Nasopharyngeal swab taken?                                                                                         | <input type="radio"/> yes <input type="radio"/> no <input type="checkbox"/> PCR            |                                                                                                                                      |
| <b>Study flow</b>                                                                                                  |                                                                                            |                                                                                                                                      |
| <b>D0</b>                                                                                                          | Recruitment:                                                                               | 05_02_CLEAR_D0_CRF_Healthy<br>05_10_CLEAR_Schedule                                                                                   |
| <b>D1-D28</b>                                                                                                      | <input type="checkbox"/> <i>if admitted to the ward:</i> Follow up until discharge:        | 05_05_CLEAR_Hosp_CRF                                                                                                                 |
| <b>D1-D28</b>                                                                                                      | Daily telephone interview or follow up at the hospital if inpatient,                       | 05_03_CLEAR_FU_DailyInterview<br>05_04_CLEAR_FU_DailyLog<br>05_09_CLEAR_FU_MedicationUse                                             |
| <b>M1/M6/M13</b>                                                                                                   | Household visit: collection of Heparin blood for ELISA<br>Socioeconomic Questionnaire (M1) | 05_07_CLEAR_FU_MonthlyTmodule1<br>05_08_CLEAR_FU_MonthlyTmodule2<br>05_06_CLEAR_CRF_SEP_HHvisit (M1)<br>05_09_CLEAR_FU_MedicationUse |
| <b>M2-M12\M6</b>                                                                                                   | Monthly telephone interview                                                                | 05_07_CLEAR_FU_MonthlyTmodule1<br>05_08_CLEAR_FU_MonthlyTmodule2<br>05_09_CLEAR_FU_MedicationUse                                     |
| <b>END OF FOLLOW UP</b>                                                                                            |                                                                                            |                                                                                                                                      |



|                                                                                                                                                                       |           |                                                                                      |                                                              |                                                                  |
|-----------------------------------------------------------------------------------------------------------------------------------------------------------------------|-----------|--------------------------------------------------------------------------------------|--------------------------------------------------------------|------------------------------------------------------------------|
| <br> | Page<br>2 | <b>CLEAR</b><br><b>Recruitment Review Form</b><br><b>St. Francis Xavier Hospital</b> | Participant ID<br> _ _ _ _ -<br> _ _ _ _ _ _ _ _ <br>- _ _ _ | Screening ID<br> _ _ _ _ _ -<br> _ _ _ _ _ _ _ _ _ <br>- _ _ _ _ |
| END OF FOLLOW UP                                                                                                                                                      |           |                                                                                      |                                                              |                                                                  |

|  |                                                    |                |
|--|----------------------------------------------------|----------------|
|  | <b>CLEAR</b><br><b>Follow up – Daily Interview</b> | Participant ID |
|--|----------------------------------------------------|----------------|

**A. Follow up information**

|     |                         |                                                                               |
|-----|-------------------------|-------------------------------------------------------------------------------|
| A01 | First date of follow up | <input type="text"/> / <input type="text"/> / <input type="text"/> (dd/mm/yy) |
|-----|-------------------------|-------------------------------------------------------------------------------|

**B. Symptoms since last contact** ☐ *please add another sheet if this one is full*

| No.                                                                                           | Are you experiencing any of the following?                     | Day __                                             |
|-----------------------------------------------------------------------------------------------|----------------------------------------------------------------|----------------------------------------------------|----------------------------------------------------|----------------------------------------------------|----------------------------------------------------|----------------------------------------------------|----------------------------------------------------|----------------------------------------------------|
| B01                                                                                           | Any symptoms experienced?                                      | <input type="radio"/> no <input type="radio"/> yes |
| <input type="checkbox"/> <i>if yes, please probe for the whole list of symptoms:</i>          |                                                                |                                                    |                                                    |                                                    |                                                    |                                                    |                                                    |                                                    |
| B01a                                                                                          | Fever ≥ 38°C                                                   | <input type="radio"/> no <input type="radio"/> yes |
| B01b                                                                                          | Chills                                                         | <input type="radio"/> no <input type="radio"/> yes |
| B01c                                                                                          | Runny nose                                                     | <input type="radio"/> no <input type="radio"/> yes |
| B01d                                                                                          | Cough                                                          | <input type="radio"/> no <input type="radio"/> yes |
| B01e                                                                                          | Sore throat                                                    | <input type="radio"/> no <input type="radio"/> yes |
| B01f                                                                                          | Shortness of breath                                            | <input type="radio"/> no <input type="radio"/> yes |
| B01g                                                                                          | Loss of sense of smell                                         | <input type="radio"/> no <input type="radio"/> yes |
| B01h                                                                                          | Distorted sense of taste                                       | <input type="radio"/> no <input type="radio"/> yes |
| B01i                                                                                          | Muscle pain                                                    | <input type="radio"/> no <input type="radio"/> yes |
| B01j                                                                                          | Diarrhoea                                                      | <input type="radio"/> no <input type="radio"/> yes |
| B01k                                                                                          | Vomiting/Nausea                                                | <input type="radio"/> no <input type="radio"/> yes |
| B01l                                                                                          | Headache                                                       | <input type="radio"/> no <input type="radio"/> yes |
| B01m                                                                                          | Tiredness or malaise                                           | <input type="radio"/> no <input type="radio"/> yes |
| B01n                                                                                          | Skin rash or skin ulcer                                        | <input type="radio"/> no <input type="radio"/> yes |
| B01o                                                                                          | Pink eye                                                       | <input type="radio"/> no <input type="radio"/> yes |
| B01p                                                                                          | Other[1]:                                                      | <input type="radio"/> no <input type="radio"/> yes |
| B01q                                                                                          | Other[2]:                                                      | <input type="radio"/> no <input type="radio"/> yes |
| B01r                                                                                          | Other[3]:                                                      | <input type="radio"/> no <input type="radio"/> yes |
| B02                                                                                           | Remarks                                                        |                                                    |                                                    |                                                    |                                                    |                                                    |                                                    |                                                    |
| B03                                                                                           | <b>Did the participant have symptoms in the last 48 hours?</b> | <input type="radio"/> no <input type="radio"/> yes |
| <input type="checkbox"/> <i>if no: the daily follow up phase is over after the interview!</i> |                                                                |                                                    |                                                    |                                                    |                                                    |                                                    |                                                    |                                                    |

**C. Health care provider since last contact**

| No.                                                                                                                                                               | Question                                                                                            | Day __                                             |
|-------------------------------------------------------------------------------------------------------------------------------------------------------------------|-----------------------------------------------------------------------------------------------------|----------------------------------------------------|----------------------------------------------------|----------------------------------------------------|----------------------------------------------------|----------------------------------------------------|----------------------------------------------------|----------------------------------------------------|
| C01                                                                                                                                                               | Have you taken any medications for your current illness?                                            | <input type="radio"/> no <input type="radio"/> yes |
| <input type="checkbox"/> <i>if yes, please probe for any medication taken (e.g. tablets intake, etc.): 'Medication use'</i>                                       |                                                                                                     |                                                    |                                                    |                                                    |                                                    |                                                    |                                                    |                                                    |
| C02                                                                                                                                                               | Have you sought care from a traditional healer?                                                     | <input type="radio"/> no <input type="radio"/> yes |
| C02a                                                                                                                                                              | <input type="checkbox"/> <i>if yes:</i> Any measure indicated from there? (e.g. <i>herbal tea</i> ) | <input type="radio"/> no <input type="radio"/> yes |
| C02b                                                                                                                                                              | <input type="checkbox"/> <i>if yes, please specify:</i>                                             |                                                    |                                                    |                                                    |                                                    |                                                    |                                                    |                                                    |
| C03                                                                                                                                                               | Have you used any therapy due to health problems, since the last time we were in contact?           | <input type="radio"/> no <input type="radio"/> yes |
| <input type="checkbox"/> <i>if yes, please probe for any measurements taken (e.g. nebulization, physiotherapy, massage, heat therapy, etc.): 'Medication use'</i> |                                                                                                     |                                                    |                                                    |                                                    |                                                    |                                                    |                                                    |                                                    |
| D01                                                                                                                                                               | Interviewer initials                                                                                | <input type="text"/>                               |

|                                                                                                                                                                   |                                              |                |
|-------------------------------------------------------------------------------------------------------------------------------------------------------------------|----------------------------------------------|----------------|
|   | <b>CLEAR</b><br><b>Follow up – Daily Log</b> | Participant ID |
|-------------------------------------------------------------------------------------------------------------------------------------------------------------------|----------------------------------------------|----------------|

**A. Follow up information**

|     |                                                                   |
|-----|-------------------------------------------------------------------|
| A01 | First date of Follow up     _ _ _  /  _ _ _  /  _ _ _  (dd/mm/yy) |
| A02 | Identification:                                                   |
| A03 | Telephone number:                                                 |

**B. Termination of daily interviews**

|     |                                                                                                                                                                          |
|-----|--------------------------------------------------------------------------------------------------------------------------------------------------------------------------|
| B01 | Last date     _ _ _  /  _ _ _  /  _ _ _  (dd/mm/yy)                                                                                                                      |
| B02 | Outcome<br><input type="radio"/> Follow up for 48 hours without symptoms<br><input type="radio"/> Follow up completed (up to day 28)<br><input type="radio"/> Withdrawal |
| B03 | Telephone interviewer:     _ _ _ _ _  (initials)                                                                                                                         |

**C. Protocol of telephone interviews I [Please add another protocol page after 7 days]**

| Day | Date and Interviewer initials    | Time of calls                                                 | Outcome<br>(after 3 trials)                                                                                                                                | Daily Interview<br>done?                                                                   | Medication Use<br>updated?                                                                 | End time                                                                          |
|-----|----------------------------------|---------------------------------------------------------------|------------------------------------------------------------------------------------------------------------------------------------------------------------|--------------------------------------------------------------------------------------------|--------------------------------------------------------------------------------------------|-----------------------------------------------------------------------------------|
| 01  | _ _ _ / _ _ _ / _ _ _ <br> _ _ _ | 1.  _ _ _ : _ _ _ <br>2.  _ _ _ : _ _ _ <br>3.  _ _ _ : _ _ _ | <input type="radio"/> P. reached<br><input type="radio"/> P. not reached<br><input type="radio"/> Call interrupted<br><input type="radio"/> P. not willing | <input type="radio"/> no <input type="radio"/> yes<br><input type="checkbox"/> if no, why? | <input type="radio"/> no <input type="radio"/> yes<br><input type="checkbox"/> if no, why? | _ _ _ : _ _ _ <br>Symptoms?<br><input type="radio"/> no <input type="radio"/> yes |
| 02  | _ _ _ / _ _ _ / _ _ _ <br> _ _ _ | 1.  _ _ _ : _ _ _ <br>2.  _ _ _ : _ _ _ <br>3.  _ _ _ : _ _ _ | <input type="radio"/> P. reached<br><input type="radio"/> P. not reached<br><input type="radio"/> Call interrupted<br><input type="radio"/> P. not willing | <input type="radio"/> no <input type="radio"/> yes<br><input type="checkbox"/> if no, why? | <input type="radio"/> no <input type="radio"/> yes<br><input type="checkbox"/> if no, why? | _ _ _ : _ _ _ <br>Symptoms?<br><input type="radio"/> no <input type="radio"/> yes |
| 03  | _ _ _ / _ _ _ / _ _ _ <br> _ _ _ | 1.  _ _ _ : _ _ _ <br>2.  _ _ _ : _ _ _ <br>3.  _ _ _ : _ _ _ | <input type="radio"/> P. reached<br><input type="radio"/> P. not reached<br><input type="radio"/> Call interrupted<br><input type="radio"/> P. not willing | <input type="radio"/> no <input type="radio"/> yes<br><input type="checkbox"/> if no, why? | <input type="radio"/> no <input type="radio"/> yes<br><input type="checkbox"/> if no, why? | _ _ _ : _ _ _ <br>Symptoms?<br><input type="radio"/> no <input type="radio"/> yes |
| 04  | _ _ _ / _ _ _ / _ _ _ <br> _ _ _ | 1.  _ _ _ : _ _ _ <br>2.  _ _ _ : _ _ _ <br>3.  _ _ _ : _ _ _ | <input type="radio"/> P. reached<br><input type="radio"/> P. not reached<br><input type="radio"/> Call interrupted<br><input type="radio"/> P. not willing | <input type="radio"/> no <input type="radio"/> yes<br><input type="checkbox"/> if no, why? | <input type="radio"/> no <input type="radio"/> yes<br><input type="checkbox"/> if no, why? | _ _ _ : _ _ _ <br>Symptoms?<br><input type="radio"/> no <input type="radio"/> yes |
| 05  | _ _ _ / _ _ _ / _ _ _ <br> _ _ _ | 1.  _ _ _ : _ _ _ <br>2.  _ _ _ : _ _ _ <br>3.  _ _ _ : _ _ _ | <input type="radio"/> P. reached<br><input type="radio"/> P. not reached<br><input type="radio"/> Call interrupted<br><input type="radio"/> P. not willing | <input type="radio"/> no <input type="radio"/> yes<br><input type="checkbox"/> if no, why? | <input type="radio"/> no <input type="radio"/> yes<br><input type="checkbox"/> if no, why? | _ _ _ : _ _ _ <br>Symptoms?<br><input type="radio"/> no <input type="radio"/> yes |
| 06  | _ _ _ / _ _ _ / _ _ _ <br> _ _ _ | 1.  _ _ _ : _ _ _ <br>2.  _ _ _ : _ _ _ <br>3.  _ _ _ : _ _ _ | <input type="radio"/> P. reached<br><input type="radio"/> P. not reached<br><input type="radio"/> Call interrupted<br><input type="radio"/> P. not willing | <input type="radio"/> no <input type="radio"/> yes<br><input type="checkbox"/> if no, why? | <input type="radio"/> no <input type="radio"/> yes<br><input type="checkbox"/> if no, why? | _ _ _ : _ _ _ <br>Symptoms?<br><input type="radio"/> no <input type="radio"/> yes |
| 07  | _ _ _ / _ _ _ / _ _ _ <br> _ _ _ | 1.  _ _ _ : _ _ _ <br>2.  _ _ _ : _ _ _ <br>3.  _ _ _ : _ _ _ | <input type="radio"/> P. reached<br><input type="radio"/> P. not reached<br><input type="radio"/> Call interrupted<br><input type="radio"/> P. not willing | <input type="radio"/> no <input type="radio"/> yes<br><input type="checkbox"/> if no, why? | <input type="radio"/> no <input type="radio"/> yes<br><input type="checkbox"/> if no, why? | _ _ _ : _ _ _ <br>Symptoms?<br><input type="radio"/> no <input type="radio"/> yes |

**C. Protocol of telephone interviews (continuation)**

| Day | Date and Interviewer initials                                                                                 | Time of calls                       | Outcome<br>(after 3 trials)                                                                                                                                | Daily Interview<br>done?                                                                   | Medication Use<br>updated?                                                                 | End time                                                                                                       |
|-----|---------------------------------------------------------------------------------------------------------------|-------------------------------------|------------------------------------------------------------------------------------------------------------------------------------------------------------|--------------------------------------------------------------------------------------------|--------------------------------------------------------------------------------------------|----------------------------------------------------------------------------------------------------------------|
| —   | <div style="display: flex; justify-content: space-between;"> <span>   /   /   </span> <span>   </span> </div> | 1.    :   <br>2.    :   <br>3.    : | <input type="radio"/> P. reached<br><input type="radio"/> P. not reached<br><input type="radio"/> Call interrupted<br><input type="radio"/> P. not willing | <input type="radio"/> no <input type="radio"/> yes<br><input type="checkbox"/> if no, why? | <input type="radio"/> no <input type="radio"/> yes<br><input type="checkbox"/> if no, why? | <div style="text-align: center;">   :   </div> Symptoms?<br><input type="radio"/> no <input type="radio"/> yes |
| —   | <div style="display: flex; justify-content: space-between;"> <span>   /   /   </span> <span>   </span> </div> | 1.    :   <br>2.    :   <br>3.    : | <input type="radio"/> P. reached<br><input type="radio"/> P. not reached<br><input type="radio"/> Call interrupted<br><input type="radio"/> P. not willing | <input type="radio"/> no <input type="radio"/> yes<br><input type="checkbox"/> if no, why? | <input type="radio"/> no <input type="radio"/> yes<br><input type="checkbox"/> if no, why? | <div style="text-align: center;">   :   </div> Symptoms?<br><input type="radio"/> no <input type="radio"/> yes |
| —   | <div style="display: flex; justify-content: space-between;"> <span>   /   /   </span> <span>   </span> </div> | 1.    :   <br>2.    :   <br>3.    : | <input type="radio"/> P. reached<br><input type="radio"/> P. not reached<br><input type="radio"/> Call interrupted<br><input type="radio"/> P. not willing | <input type="radio"/> no <input type="radio"/> yes<br><input type="checkbox"/> if no, why? | <input type="radio"/> no <input type="radio"/> yes<br><input type="checkbox"/> if no, why? | <div style="text-align: center;">   :   </div> Symptoms?<br><input type="radio"/> no <input type="radio"/> yes |
| —   | <div style="display: flex; justify-content: space-between;"> <span>   /   /   </span> <span>   </span> </div> | 1.    :   <br>2.    :   <br>3.    : | <input type="radio"/> P. reached<br><input type="radio"/> P. not reached<br><input type="radio"/> Call interrupted<br><input type="radio"/> P. not willing | <input type="radio"/> no <input type="radio"/> yes<br><input type="checkbox"/> if no, why? | <input type="radio"/> no <input type="radio"/> yes<br><input type="checkbox"/> if no, why? | <div style="text-align: center;">   :   </div> Symptoms?<br><input type="radio"/> no <input type="radio"/> yes |
| —   | <div style="display: flex; justify-content: space-between;"> <span>   /   /   </span> <span>   </span> </div> | 1.    :   <br>2.    :   <br>3.    : | <input type="radio"/> P. reached<br><input type="radio"/> P. not reached<br><input type="radio"/> Call interrupted<br><input type="radio"/> P. not willing | <input type="radio"/> no <input type="radio"/> yes<br><input type="checkbox"/> if no, why? | <input type="radio"/> no <input type="radio"/> yes<br><input type="checkbox"/> if no, why? | <div style="text-align: center;">   :   </div> Symptoms?<br><input type="radio"/> no <input type="radio"/> yes |
| —   | <div style="display: flex; justify-content: space-between;"> <span>   /   /   </span> <span>   </span> </div> | 1.    :   <br>2.    :   <br>3.    : | <input type="radio"/> P. reached<br><input type="radio"/> P. not reached<br><input type="radio"/> Call interrupted<br><input type="radio"/> P. not willing | <input type="radio"/> no <input type="radio"/> yes<br><input type="checkbox"/> if no, why? | <input type="radio"/> no <input type="radio"/> yes<br><input type="checkbox"/> if no, why? | <div style="text-align: center;">   :   </div> Symptoms?<br><input type="radio"/> no <input type="radio"/> yes |
| —   | <div style="display: flex; justify-content: space-between;"> <span>   /   /   </span> <span>   </span> </div> | 1.    :   <br>2.    :   <br>3.    : | <input type="radio"/> P. reached<br><input type="radio"/> P. not reached<br><input type="radio"/> Call interrupted<br><input type="radio"/> P. not willing | <input type="radio"/> no <input type="radio"/> yes<br><input type="checkbox"/> if no, why? | <input type="radio"/> no <input type="radio"/> yes<br><input type="checkbox"/> if no, why? | <div style="text-align: center;">   :   </div> Symptoms?<br><input type="radio"/> no <input type="radio"/> yes |
| —   | <div style="display: flex; justify-content: space-between;"> <span>   /   /   </span> <span>   </span> </div> | 1.    :   <br>2.    :   <br>3.    : | <input type="radio"/> P. reached<br><input type="radio"/> P. not reached<br><input type="radio"/> Call interrupted<br><input type="radio"/> P. not willing | <input type="radio"/> no <input type="radio"/> yes<br><input type="checkbox"/> if no, why? | <input type="radio"/> no <input type="radio"/> yes<br><input type="checkbox"/> if no, why? | <div style="text-align: center;">   :   </div> Symptoms?<br><input type="radio"/> no <input type="radio"/> yes |
| —   | <div style="display: flex; justify-content: space-between;"> <span>   /   /   </span> <span>   </span> </div> | 1.    :   <br>2.    :   <br>3.    : | <input type="radio"/> P. reached<br><input type="radio"/> P. not reached<br><input type="radio"/> Call interrupted<br><input type="radio"/> P. not willing | <input type="radio"/> no <input type="radio"/> yes<br><input type="checkbox"/> if no, why? | <input type="radio"/> no <input type="radio"/> yes<br><input type="checkbox"/> if no, why? | <div style="text-align: center;">   :   </div> Symptoms?<br><input type="radio"/> no <input type="radio"/> yes |
| —   | <div style="display: flex; justify-content: space-between;"> <span>   /   /   </span> <span>   </span> </div> | 1.    :   <br>2.    :   <br>3.    : | <input type="radio"/> P. reached<br><input type="radio"/> P. not reached<br><input type="radio"/> Call interrupted<br><input type="radio"/> P. not willing | <input type="radio"/> no <input type="radio"/> yes<br><input type="checkbox"/> if no, why? | <input type="radio"/> no <input type="radio"/> yes<br><input type="checkbox"/> if no, why? | <div style="text-align: center;">   :   </div> Symptoms?<br><input type="radio"/> no <input type="radio"/> yes |



### A. Identification

|     |                                                |                                                         |               |
|-----|------------------------------------------------|---------------------------------------------------------|---------------|
| A01 | Hospital-ID                                    | _ _ _ _ _ _ _ _  /  _ _ _                               | Screening ID: |
| A02 | Age                                            | _ _  years                                              |               |
| A03 | Sex                                            | <input type="radio"/> male <input type="radio"/> female |               |
| A04 | Community                                      | _____                                                   |               |
| A05 | Date of interview                              | _ _  /  _ _  /  _ _  (dd/mm/yy)                         |               |
| A06 | Is the patient participating in another study? | <input type="radio"/> no <input type="radio"/> yes      |               |
|     | → if yes, which? _____                         |                                                         |               |

### B. Admission

|     |                                                                                                   |                                                    |
|-----|---------------------------------------------------------------------------------------------------|----------------------------------------------------|
| B01 | Date of admission                                                                                 | _ _  /  _ _  /  _ _  (dd/mm/yy)                    |
| B02 | Has the patient been referred by another hospital?                                                | <input type="radio"/> no <input type="radio"/> yes |
|     | → if yes, hospitalized for more than two days? <input type="radio"/> no <input type="radio"/> yes |                                                    |
| B03 | Ward                                                                                              | _____                                              |

### C. Pregnancy [only if the women is/was pregnant]

|     |                                                                                                      |                                                                                                                                                                                                              |
|-----|------------------------------------------------------------------------------------------------------|--------------------------------------------------------------------------------------------------------------------------------------------------------------------------------------------------------------|
| C01 | Assessment date                                                                                      | _ _  /  _ _  /  _ _  (dd/mm/yy)                                                                                                                                                                              |
| C02 | Are there any complications?                                                                         | <input type="radio"/> no <input type="radio"/> yes                                                                                                                                                           |
|     | → if yes, which? _____                                                                               |                                                                                                                                                                                                              |
| C03 | Outcome at discharge:                                                                                | <input type="radio"/> Still pregnant <input type="radio"/> Birth (regular) <input type="radio"/> Preterm birth<br><input type="radio"/> Stillbirth <input type="radio"/> Abort <input type="radio"/> Unknown |
| C04 | → if pregnancy was terminated, Date  _ _  /  _ _  /  _ _  (dd/mm/yy)                                 |                                                                                                                                                                                                              |
| C05 | → if baby delivered, Is the mother breastfeeding? <input type="radio"/> no <input type="radio"/> yes |                                                                                                                                                                                                              |

### D. Clinical management during hospital stay – Oxygen Therapy

|     |                                                                       |                                                                                                                                                                                                                     |
|-----|-----------------------------------------------------------------------|---------------------------------------------------------------------------------------------------------------------------------------------------------------------------------------------------------------------|
| D01 | Did the patient receive oxygen therapy during hospitalization?        | <input type="radio"/> no <input type="radio"/> yes <input type="radio"/> unknown                                                                                                                                    |
|     | → if yes,                                                             |                                                                                                                                                                                                                     |
| D01 | Did the patient receive invasive ventilation?                         | <input type="radio"/> no <input type="radio"/> yes <input type="radio"/> unknown                                                                                                                                    |
|     | Did the patient receive non-invasive ventilation (e.g CPAP / BIPAP) ? | <input type="radio"/> no <input type="radio"/> yes <input type="radio"/> unknown                                                                                                                                    |
|     | → if yes (non-invasive ventilation), please specify:                  |                                                                                                                                                                                                                     |
| D01 | Source of oxygen:                                                     | <input type="radio"/> Piped <input type="radio"/> Cylinder <input type="radio"/> Concentrator <input type="radio"/> Unknown                                                                                         |
|     | Interface:                                                            | <input type="radio"/> Nasal prongs <input type="radio"/> HF nasal cannula <input type="radio"/> Mask<br><input type="radio"/> Mask with reservoir <input type="radio"/> CPAP/NIV mask <input type="radio"/> unknown |
|     | Inotropes/vasopressors?                                               | <input type="radio"/> no <input type="radio"/> yes <input type="radio"/> unknown                                                                                                                                    |

Renal replacement therapy (RRT) or dialysis? ☐ no ☐ yes ☐ unknown

### D. Clinical management during hospital stay – Antibiotic therapy

| D02                      | Antibiotic received?                                                                                                | <input type="radio"/> no <input type="radio"/> yes <input type="radio"/> unknown |
|--------------------------|---------------------------------------------------------------------------------------------------------------------|----------------------------------------------------------------------------------|
|                          | → if yes, please specify:                                                                                           |                                                                                  |
| Please tick              |                                                                                                                     | Start date (dd/mm/yy) –<br>End date (dd/mm/yy)                                   |
| <input type="checkbox"/> | Macrolides (e.g. Azithromycin, Clarithromycin)                                                                      | _ _  /  _ _  /  _ _  –<br> _ _  /  _ _  /  _ _  <input type="radio"/> ongoing    |
| <input type="checkbox"/> | Fluoroquinolones (e.g. ciprofloxacin, levofloxacin)                                                                 | _ _  /  _ _  /  _ _  –<br> _ _  /  _ _  /  _ _  <input type="radio"/> ongoing    |
| <input type="checkbox"/> | 3 <sup>rd</sup> and 4 <sup>th</sup> generation Cephalosporins (e.g. ceftriaxone, defotaxime, ceftazidime, cefepime) | _ _  /  _ _  /  _ _  –<br> _ _  /  _ _  /  _ _  <input type="radio"/> ongoing    |
| <input type="checkbox"/> | Carbapenems (e.g. imipenem, meropenem)                                                                              | _ _  /  _ _  /  _ _  –<br> _ _  /  _ _  /  _ _  <input type="radio"/> ongoing    |
| <input type="checkbox"/> | Piperacillin + Tazobactam                                                                                           | _ _  /  _ _  /  _ _  –<br> _ _  /  _ _  /  _ _  <input type="radio"/> ongoing    |
| <input type="checkbox"/> | Amoxicillin-clavulanate                                                                                             | _ _  /  _ _  /  _ _  –<br> _ _  /  _ _  /  _ _  <input type="radio"/> ongoing    |
| <input type="checkbox"/> | Ampicillin                                                                                                          | _ _  /  _ _  /  _ _  –<br> _ _  /  _ _  /  _ _  <input type="radio"/> ongoing    |
| <input type="checkbox"/> | Cotrimoxazole                                                                                                       | _ _  /  _ _  /  _ _  –<br> _ _  /  _ _  /  _ _  <input type="radio"/> ongoing    |
| <input type="checkbox"/> | Other antibiotics:                                                                                                  |                                                                                  |
|                          | 1.)                                                                                                                 | _ _  /  _ _  /  _ _  –<br> _ _  /  _ _  /  _ _  <input type="radio"/> ongoing    |
|                          | 2.)                                                                                                                 | _ _  /  _ _  /  _ _  –<br> _ _  /  _ _  /  _ _  <input type="radio"/> ongoing    |
|                          | 3.)                                                                                                                 | _ _  /  _ _  /  _ _  –<br> _ _  /  _ _  /  _ _  <input type="radio"/> ongoing    |

**CLEAR**  
**Case Report Form – Hospitalization**  
**St. Francis Xavier Hospital**

Visit Bar Code

**D. Clinical management during hospital stay – Other drugs I**

|     |                                                                                                                                                                                                                                                                                                                                                                                                                                                                                                |
|-----|------------------------------------------------------------------------------------------------------------------------------------------------------------------------------------------------------------------------------------------------------------------------------------------------------------------------------------------------------------------------------------------------------------------------------------------------------------------------------------------------|
| D03 | Antithrombotic/anticoagulation drugs received? <input type="radio"/> no <input type="radio"/> yes <input type="radio"/> unknown<br>→ if yes, specify: <input type="checkbox"/> Unfractionated heparin<br><input type="checkbox"/> Low molecular weight heparin<br><input type="checkbox"/> Warfarin<br><input type="checkbox"/> Direct oral anticoagulant<br><input type="checkbox"/> Other: _____                                                                                             |
|     | Dose: <input type="radio"/> Preventive dose <input type="radio"/> Therapeutic dose                                                                                                                                                                                                                                                                                                                                                                                                             |
| D04 | Antiviral drugs received? <input type="radio"/> no <input type="radio"/> yes <input type="radio"/> unknown<br>→ if yes, specify: <input type="checkbox"/> Lopinavir/Ritonavir<br><input type="checkbox"/> Darunavir +/- cobiscistat<br><input type="checkbox"/> Remdesivir<br><input type="checkbox"/> Favipiravir<br><input type="checkbox"/> Acyclovir/Ganciclovir<br><input type="checkbox"/> Oseltamivir<br><input type="checkbox"/> Nirmatrelvir<br><input type="checkbox"/> Other: _____ |
|     |                                                                                                                                                                                                                                                                                                                                                                                                                                                                                                |
| D05 | Antifungal agent received? <input type="radio"/> no <input type="radio"/> yes <input type="radio"/> unknown<br>→ if yes, specify: _____                                                                                                                                                                                                                                                                                                                                                        |
|     | Non-Steroidal anti-inflammatory (NSAID) received? <input type="radio"/> no <input type="radio"/> yes <input type="radio"/> unknown<br>→ if yes, specify: _____                                                                                                                                                                                                                                                                                                                                 |
| D06 | Blood derived products received? <input type="radio"/> no <input type="radio"/> yes <input type="radio"/> unknown<br>→ if yes, specify: <input type="checkbox"/> IV immune globulin<br><input type="checkbox"/> Convalescent plasma<br><input type="checkbox"/> Other: _____                                                                                                                                                                                                                   |
|     |                                                                                                                                                                                                                                                                                                                                                                                                                                                                                                |

**D. Clinical management during hospital stay – Other drugs II**

|     |                                                                                                                                                                                                                                                                                                                                                                                                                         |
|-----|-------------------------------------------------------------------------------------------------------------------------------------------------------------------------------------------------------------------------------------------------------------------------------------------------------------------------------------------------------------------------------------------------------------------------|
| D07 | Experimental agents received? <input type="radio"/> no <input type="radio"/> yes <input type="radio"/> unknown<br>→ if yes, specify: <input type="checkbox"/> Ivermectin<br><input type="checkbox"/> Ciclesonide<br><input type="checkbox"/> Nitazoxanide<br><input type="checkbox"/> ASAQ<br><input type="checkbox"/> Fluoxetine<br><input type="checkbox"/> Budesonide<br><input type="checkbox"/> Other agent: _____ |
|     |                                                                                                                                                                                                                                                                                                                                                                                                                         |
| D08 | Steroids received? <input type="radio"/> no <input type="radio"/> yes <input type="radio"/> unknown<br>→ if yes, specify: <input type="checkbox"/> Dexamethasone<br><input type="checkbox"/> Hydrocortisone<br><input type="checkbox"/> Prednisone<br><input type="checkbox"/> Methylprednisolone<br><input type="checkbox"/> Other: _____                                                                              |
|     | Duration of steroid therapy:  __   __  days                                                                                                                                                                                                                                                                                                                                                                             |
| D09 | Other drugs received? <input type="radio"/> no <input type="radio"/> yes <input type="radio"/> unknown<br>→ if yes, specify:                                                                                                                                                                                                                                                                                            |
|     | 1.) _____<br>2.) _____<br>3.) _____                                                                                                                                                                                                                                                                                                                                                                                     |

**E. Diagnostics**

|                |                                                                                                                                   |
|----------------|-----------------------------------------------------------------------------------------------------------------------------------|
| E01            | <b>Rx Thorax</b>                                                                                                                  |
|                | Was the assessment completed? <input type="radio"/> no <input type="radio"/> yes                                                  |
|                | Assessment date (dd/mm/yy)  __   __  /  __   __  /  __   __                                                                       |
|                | Result assessable <input type="radio"/> normal <input type="radio"/> abnormal <input type="radio"/> not                           |
|                | → if abnormal, relation to COVID-19 <input type="radio"/> related <input type="radio"/> not related <input type="radio"/> unknown |
|                | Clinical significant? <input type="radio"/> no <input type="radio"/> yes                                                          |
| Remarks: _____ |                                                                                                                                   |

**CLEAR**  
**Case Report Form – Hospitalization**  
**St. Francis Xavier Hospital**

Visit Bar Code

**F. Laboratory analyses**

|     |                                                                                                                                                                                                                                                                                                                                                                                                                                                                                                                                                                                                                                                                                                                                                                                                                                                                                                       |
|-----|-------------------------------------------------------------------------------------------------------------------------------------------------------------------------------------------------------------------------------------------------------------------------------------------------------------------------------------------------------------------------------------------------------------------------------------------------------------------------------------------------------------------------------------------------------------------------------------------------------------------------------------------------------------------------------------------------------------------------------------------------------------------------------------------------------------------------------------------------------------------------------------------------------|
| F01 | Which of the following laboratory analysis were conducted?<br><input type="checkbox"/> WBC/FBC <input type="checkbox"/> Urine                                                                                                                                                                                                                                                                                                                                                                                                                                                                                                                                                                                                                                                                                                                                                                         |
| F02 | Were sample(s) sent to the lab for culture (Tick if yes and add number)<br><input type="checkbox"/> Blood      Number: <input type="text"/> <input type="text"/> <input type="text"/><br><input type="checkbox"/> Urine      Number: <input type="text"/> <input type="text"/> <input type="text"/><br><input type="checkbox"/> Cerebrospinal fluid      Number: <input type="text"/> <input type="text"/> <input type="text"/><br><input type="checkbox"/> Wound      Number: <input type="text"/> <input type="text"/> <input type="text"/><br><input type="checkbox"/> BAL (protected resp. specimen)      Number: <input type="text"/> <input type="text"/> <input type="text"/><br><input type="checkbox"/> Sputum/bronchial aspirate      Number: <input type="text"/> <input type="text"/> <input type="text"/><br><input type="checkbox"/> Other type of specimen      If yes, specify: _____ |
| F03 | Were results of the antibiotic susceptibility testing made available?<br><input type="radio"/> Yes <input type="radio"/> No                                                                                                                                                                                                                                                                                                                                                                                                                                                                                                                                                                                                                                                                                                                                                                           |
| F04 | If yes, on which day?<br><input type="text"/> <input type="text"/> <input type="text"/> / <input type="text"/> <input type="text"/> <input type="text"/> / <input type="text"/> <input type="text"/> <input type="text"/> (dd/mm/yy)                                                                                                                                                                                                                                                                                                                                                                                                                                                                                                                                                                                                                                                                  |

**G. Discharge**

|     |                                                                                                                                                                                                                                                                                                                                                                                                                       |
|-----|-----------------------------------------------------------------------------------------------------------------------------------------------------------------------------------------------------------------------------------------------------------------------------------------------------------------------------------------------------------------------------------------------------------------------|
| G01 | Date of hospital discharge: <input type="text"/> <input type="text"/> <input type="text"/> / <input type="text"/> <input type="text"/> <input type="text"/> / <input type="text"/> <input type="text"/> <input type="text"/> (dd/mm/yy)                                                                                                                                                                               |
| G02 | Duration of hospital stay (total):<br><input type="text"/> <input type="text"/> <input type="text"/> <input type="text"/> days                                                                                                                                                                                                                                                                                        |
| G03 | Outcome: <input type="radio"/> fully recovered without ongoing treatment<br><input type="radio"/> discharged with ongoing treatment<br><input type="radio"/> discharged with permanent disability/treatment<br><input type="radio"/> referred to another hospital<br><input type="radio"/> died<br><input type="radio"/> still hospitalized, but case was closed<br><input type="radio"/> absconded/lost to follow-up |
| G04 | <b>Diagnoses on discharge</b><br>1 <sup>st</sup> Diagnosis: _____<br>2 <sup>nd</sup> Diagnosis: _____<br>3 <sup>rd</sup> Diagnosis: _____                                                                                                                                                                                                                                                                             |
| G05 | Does the patient have confirmed malaria? <input type="radio"/> no <input type="radio"/> yes <input type="radio"/> unknown<br>→ if yes, is it severe malaria? <input type="radio"/> no <input type="radio"/> yes <input type="radio"/> unknown<br>Does the patient have confirmed bacterial sepsis? <input type="radio"/> no <input type="radio"/> yes <input type="radio"/> unknown                                   |

**H. Remarks**

|  |
|--|
|  |
|--|

**I. Responsibilities**

**Study nurse** who filled in the questionnaire:

Initials          Date    /    /    (dd/mm/yy)

**Doctor** who filled in the questionnaire:

Initials          Date    /    /    (dd/mm/yy)

**Study nurse/ staff** who performed the bedside tests:

Initials          Date    /    /    (dd/mm/yy)

**Study Doctor** who checked the questionnaire:

Initials          Date    /    /    (dd/mm/yy)

**Data staff** who entered the data in the database:

Initials          Date    /    /    (dd/mm/yy)

**Data staff** who reviewed the data entry:

Initials          Date    /    /    (dd/mm/yy)
