# Supplementary material for: Clinical and epidemiological characterization of viral respiratory pathogens in rural Ghana: The role of SARS-CoV-2 and Malaria in the immediate post-pandemic phase
Source: Research Square preprint supplement (doi:10.21203/rs.3.rs-8287787/v1), 2026-01-12
Supplement: Supplementary file 1 [file ba2e97b277bcb6207d4a2a82.docx]

Supplementary Material

| **Characteristic** | **N** | **Overall**  N = 347 | **Seropositive**  N = 277 | **Seronegative**  N = 70 | **q-value** | **SARS-CoV-2**  N = 45 | **No SARS-CoV-2**  N = 302 | **q-value** | **Malaria**  N = 99 | **No Malaria**  N = 239 | **Missing**  N = 9 | **q-value** |
| --- | --- | --- | --- | --- | --- | --- | --- | --- | --- | --- | --- | --- |
| **Demographic information** | | | | | | | | | | | | |
| Age (Median, IQR) | 347 | 48 (31, 62) | 48 (32, 63) | 47 (30, 59) | 0.6 | 43 (28, 60) | 49 (32, 63) | 0.6 | 51 (34, 65) | 45 (30, 62) | 53 (48, 58) | 0.3 |
| Sex | 347 |  |  |  | 0.012 |  |  | 0.6 |  |  |  | 0.14 |
| Female |  | 228 (66%) | 193 (70%) | 35 (50%) |  | 27 (60%) | 201 (67%) |  | 57 (58%) | 167 (70%) | 4 (44%) |  |
| Male |  | 119 (34%) | 84 (30%) | 35 (50%) |  | 18 (40%) | 101 (33%) |  | 42 (42%) | 72 (30%) | 5 (56%) |  |
| BMI classification | 347 |  |  |  | 0.4 |  |  | >0.9 |  |  |  |  |
| Underweight |  | 28 (8.1%) | 22 (7.9%) | 6 (8.6%) |  | 3 (6.7%) | 25 (8.3%) |  | 8 (8.1%) | 20 (8.4%) | 0 (0%) |  |
| Normal weight |  | 164 (47%) | 132 (48%) | 32 (46%) |  | 20 (44%) | 144 (48%) |  | 40 (40%) | 122 (51%) | 2 (22%) |  |
| Overweight |  | 67 (19%) | 52 (19%) | 15 (21%) |  | 11 (24%) | 56 (19%) |  | 21 (21%) | 44 (18%) | 2 (22%) |  |
| Obese |  | 22 (6.3%) | 21 (7.6%) | 1 (1.4%) |  | 3 (6.7%) | 19 (6.3%) |  | 6 (6.1%) | 15 (6.3%) | 1 (11%) |  |
| Missing |  | 66 (19%) | 50 (18%) | 16 (23%) |  | 8 (18%) | 58 (19%) |  | 24 (24%) | 38 (16%) | 4 (44%) |  |
| Level of schooling | 347 |  |  |  | 0.2 |  |  | 0.5 |  |  |  | 0.7 |
| None |  | 62 (18%) | 51 (18%) | 11 (16%) |  | 3 (6.7%) | 59 (20%) |  | 19 (19%) | 42 (18%) | 1 (11%) |  |
| Primary school |  | 33 (9.5%) | 23 (8.3%) | 10 (14%) |  | 3 (6.7%) | 30 (9.9%) |  | 9 (9.1%) | 23 (9.6%) | 1 (11%) |  |
| Middle school |  | 85 (24%) | 65 (23%) | 20 (29%) |  | 14 (31%) | 71 (24%) |  | 24 (24%) | 61 (26%) | 0 (0%) |  |
| High school or higher |  | 91 (26%) | 81 (29%) | 10 (14%) |  | 15 (33%) | 76 (25%) |  | 24 (24%) | 63 (26%) | 4 (44%) |  |
| Missing |  | 76 (22%) | 57 (21%) | 19 (27%) |  | 10 (22%) | 66 (22%) |  | 23 (23%) | 50 (21%) | 3 (33%) |  |
| Profession | 347 |  |  |  | 0.3 |  |  | 0.5 |  |  |  | 0.7 |
| Agriculture |  | 80 (23%) | 59 (21%) | 21 (30%) |  | 6 (13%) | 74 (25%) |  | 28 (28%) | 51 (21%) | 1 (11%) |  |
| Non-agriculture |  | 136 (39%) | 114 (41%) | 22 (31%) |  | 24 (53%) | 112 (37%) |  | 33 (33%) | 99 (41%) | 4 (44%) |  |
| Missing |  | 131 (38%) | 104 (38%) | 27 (39%) |  | 15 (33%) | 116 (38%) |  | 38 (38%) | 89 (37%) | 4 (44%) |  |
| SES quintile | 347 |  |  |  | 0.3 |  |  | >0.9 |  |  |  |  |
| 1 |  | 30 (8.6%) | 20 (7.2%) | 10 (14%) |  | 3 (6.7%) | 27 (8.9%) |  | 12 (12%) | 18 (7.5%) | 0 (0%) |  |
| 2 |  | 41 (12%) | 31 (11%) | 10 (14%) |  | 3 (6.7%) | 38 (13%) |  | 13 (13%) | 27 (11%) | 1 (11%) |  |
| 3 |  | 33 (9.5%) | 28 (10%) | 5 (7.1%) |  | 5 (11%) | 28 (9.3%) |  | 12 (12%) | 19 (7.9%) | 2 (22%) |  |
| 4 |  | 62 (18%) | 50 (18%) | 12 (17%) |  | 9 (20%) | 53 (18%) |  | 15 (15%) | 47 (20%) | 0 (0%) |  |
| 5 |  | 105 (30%) | 91 (33%) | 14 (20%) |  | 15 (33%) | 90 (30%) |  | 24 (24%) | 78 (33%) | 3 (33%) |  |
| Missing |  | 76 (22%) | 57 (21%) | 19 (27%) |  | 10 (22%) | 66 (22%) |  | 23 (23%) | 50 (21%) | 3 (33%) |  |
| **Comorbidities** | | | | | | | | | | | | |
| Cardiovascular disease | 347 | 118 (34%) | 102 (37%) | 16 (23%) | 0.2 | 13 (29%) | 105 (35%) | 0.7 | 39 (39%) | 75 (31%) | 4 (44%) | 0.4 |
| COPD | 347 | 26 (7.5%) | 19 (6.9%) | 7 (10%) | >0.9 | 3 (6.7%) | 23 (7.6%) | >0.9 | 10 (10%) | 15 (6.3%) | 1 (11%) | 0.4 |
| Chronic kidney disease (any stage) | 347 | 2 (0.6%) | 2 (0.7%) | 0 (0%) | >0.9 | 1 (2.2%) | 1 (0.3%) | 0.7 | 0 (0%) | 1 (0.4%) | 1 (11%) | 0.4 |
| Diabetes Mellitus Type 2 | 347 | 19 (5.5%) | 14 (5.1%) | 5 (7.1%) | >0.9 | 1 (2.2%) | 18 (6.0%) | 0.7 | 5 (5.1%) | 12 (5.0%) | 2 (22%) | 0.4 |
| Malignancy or Severe Inmunosupression | 347 | 2 (0.6%) | 2 (0.7%) | 0 (0%) | >0.9 | 1 (2.2%) | 1 (0.3%) | 0.7 | 0 (0%) | 2 (0.8%) | 0 (0%) | >0.9 |
| Other chronic disease | 347 | 16 (4.6%) | 12 (4.3%) | 4 (5.7%) | >0.9 | 1 (2.2%) | 15 (5.0%) | 0.8 | 2 (2.0%) | 13 (5.4%) | 1 (11%) | 0.4 |
| Pregancy | 228 | 6 (2.6%) | 5 (2.6%) | 1 (2.9%) | >0.9 | 1 (3.7%) | 5 (2.5%) | 0.7 | 0 (0%) | 6 (3.6%) | 0 (0%) | 0.5 |
| **Serostatus and vaccination** | | | | | | | | | | | | |
| Seropositive at baseline |  |  |  |  |  | 34 (76%) | 243 (80%) | 0.8 | 74 (75%) | 196 (82%) | 7 (78%) | 0.4 |
| Received at least one SARS-CoV-2 vaccination | 333 | 256 (77%) | 226 (85%) | 30 (45%) | <0.001 | 33 (79%) | 223 (77%) | 0.8 | 69 (73%) | 179 (78%) | 8 (89%) | 0.4 |
| **Severity at presentation** | | | | | | | | | | | | |
| Average PRIEST score at presentation | 264 | 4 (3, 7) | 4 (3, 6) | 4 (3, 8) | 0.4 | 4 (2, 7) | 4 (3, 6) | 0.9 | 5 (3, 8) | 4 (3, 6) | 6 (5, 7) | 0.2 |
| PRIEST score > 4 | 264 | 122 (46%) | 97 (46%) | 25 (49%) | 0.7 | 16 (47%) | 106 (46%) | >0.9 | 39 (57%) | 79 (41%) | 4 (80%) | 0.049 |
| Average PRIEST score at presentation (upper bound imputation) | 347 | 5 (3, 7) | 5 (3, 7) | 5 (4, 8) | 0.4 | 5 (3, 7) | 5 (3, 7) | 0.8 | 6 (4, 8) | 5 (3, 7) | 6 (5, 7) | 0.023 |
| Average PRIEST score at presentation (lower bound imputation) | 347 | 4 (3, 6) | 4 (3, 6) | 4 (3, 7) | 0.6 | 3 (2, 5) | 4 (3, 6) | 0.8 | 5 (3, 7) | 4 (3, 5) | 5 (3, 6) | 0.3 |
| PRIEST score > 4 (upper bound imputation) | 347 | 198 (57%) | 155 (56%) | 43 (61%) | 0.6 | 27 (60%) | 171 (57%) | 0.8 | 67 (68%) | 123 (51%) | 8 (89%) | 0.011 |
| PRIEST score > 4 (lower bound imputation) | 347 | 145 (42%) | 118 (43%) | 27 (39%) | 0.6 | 19 (42%) | 126 (42%) | >0.9 | 50 (51%) | 90 (38%) | 5 (56%) | 0.11 |
| Hospitalized after presentation | 346 | 90 (26%) | 70 (25%) | 20 (29%) | 0.6 | 13 (30%) | 77 (25%) | 0.8 | 31 (31%) | 58 (24%) | 1 (11%) | 0.3 |
| Average number of co-morbidities | 347 | 0 (0, 1) | 0 (0, 1) | 0 (0, 1) | 0.4 | 0 (0, 1) | 0 (0, 1) | 0.8 | 0 (0, 1) | 0 (0, 1) | 1 (0, 1) | 0.3 |
| Average number of symptoms | 347 | 4 (3, 5) | 4 (3, 5) | 4 (3, 5) | 0.4 | 4 (3, 6) | 4 (3, 5) | 0.12 | 4 (3, 5) | 4 (3, 5) | 4 (2, 4) | 0.4 |
| Co-infection: Malaria | 338 | 99 (29%) | 74 (27%) | 25 (37%) | 0.4 | 10 (23%) | 89 (30%) | 0.8 | 99 (100%) | 0 (0%) | 0 (NA%) | <0.001 |

Table 1. Characteristics of patients.

| **Laboratory Measure** | **N** | **Overall**  N = 347 | **Seropositive**  N = 277 | **Seronegative**  N = 70 | **q-value** | **SARS-CoV-2**  N = 45 | **No SARS-CoV-2**  N = 302 | **q-value** | **Malaria**  N = 99 | **No Malaria**  N = 239 | **q-value** |
| --- | --- | --- | --- | --- | --- | --- | --- | --- | --- | --- | --- |
| Systolic blood pressure | 346 | 124.33 [70.00-220.00] | 125.42 [70.00-220.00] | 119.96 [80.00-190.00] | 0.5 | 122.64 [90.00-210.00] | 124.58 [70.00-220.00] | 0.6 | 121.60 [70.00-210.00] | 125.20 [75.00-220.00] | 0.6 |
| Temperature, °C | 347 | 36.79 [35.00-39.90] | 36.76 [35.00-39.90] | 36.91 [35.30-39.50] | >0.9 | 37.13 [36.10-39.30] | 36.74 [35.00-39.90] | 0.031 | 36.76 [35.00-39.50] | 36.80 [35.30-39.90] | 0.8 |
| Heart rate, beats/min | 346 | 90.54 [51.00-152.00] | 90.43 [51.00-152.00] | 90.97 [62.00-135.00] | >0.9 | 94.53 [58.00-143.00] | 89.94 [51.00-152.00] | 0.4 | 89.53 [54.00-138.00] | 90.94 [51.00-152.00] | 0.7 |
| Respiratory rate, breath/min | 277 | 21.85 [14.00-50.00] | 21.93 [15.00-50.00] | 21.50 [14.00-48.00] | 0.8 | 21.19 [14.00-48.00] | 21.95 [15.00-50.00] | 0.3 | 21.60 [15.00-34.00] | 21.91 [14.00-50.00] | 0.8 |
| Oxygen saturation, % | 345 | 96.82 [70.00-100.00] | 96.94 [79.00-100.00] | 96.36 [70.00-100.00] | >0.9 | 96.05 [70.00-100.00] | 96.94 [79.00-100.00] | 0.6 | 96.51 [79.00-100.00] | 96.94 [70.00-100.00] | 0.5 |
| Total bilirubin (BIL-T), µmol/L | 329 | 9.76 [0.60-55.40] | 9.61 [0.60-55.40] | 10.36 [2.00-50.70] | >0.9 | 8.44 [0.80-28.80] | 9.94 [0.60-55.40] | 0.6 | 11.66 [0.60-50.70] | 8.82 [0.80-55.40] | 0.011 |
| Direct bilirubin (BIL-D), µmol/L | 234 | 4.85 [0.10-24.90] | 4.80 [0.10-23.00] | 5.07 [0.10-24.90] | >0.9 | 3.97 [1.60-8.10] | 4.95 [0.10-24.90] | >0.9 | 6.07 [0.10-24.90] | 4.33 [0.10-23.00] | 0.061 |
| Albumin (ALB), g/L | 304 | 40.45 [15.20-61.36] | 40.87 [20.24-61.36] | 38.76 [15.20-52.53] | 0.5 | 40.37 [20.87-54.00] | 40.46 [15.20-61.36] | 0.6 | 39.10 [15.20-52.53] | 40.98 [18.00-61.36] | 0.10 |
| Alanine aminotransferase (ALT, GPT), U/L | 316 | 22.82 [1.23-151.10] | 23.62 [1.23-151.10] | 19.72 [4.00-78.00] | 0.5 | 25.11 [7.00-151.10] | 22.53 [1.23-140.60] | >0.9 | 26.49 [4.00-140.60] | 21.15 [1.23-151.10] | 0.079 |
| Aspartate aminotransferase (AST, GOT), U/L | 315 | 32.89 [10.20-356.70] | 32.58 [10.20-356.70] | 34.08 [12.10-251.70] | >0.9 | 39.64 [14.10-356.70] | 31.94 [10.20-251.70] | 0.6 | 36.80 [10.60-123.90] | 31.31 [10.20-356.70] | 0.061 |
| Alkaline phosphatase (AP), U/L | 236 | 125.72 [1.00-712.00] | 126.63 [1.00-712.00] | 122.25 [18.32-319.00] | >0.9 | 103.00 [32.10-320.90] | 129.28 [1.00-712.00] | 0.3 | 129.75 [18.32-462.50] | 125.40 [1.00-712.00] | 0.8 |
| Lactate dehydrogenase (LDH), U/L | 203 | 266.53 [0.60-2,245.40] | 265.28 [0.60-2,245.40] | 273.23 [115.60-656.80] | 0.5 | 265.34 [144.70-656.80] | 266.69 [0.60-2,245.40] | 0.8 | 285.96 [143.00-834.00] | 259.59 [0.60-2,245.40] | 0.011 |
| Creatinine kinase (CK), U/L | 255 | 176.42 [11.30-1,810.10] | 164.90 [11.30-1,598.90] | 218.29 [17.00-1,810.10] | >0.9 | 168.68 [22.40-1,075.90] | 177.53 [11.30-1,810.10] | >0.9 | 193.36 [23.40-1,810.10] | 169.04 [11.30-1,207.40] | 0.8 |
| Urea (UREA), mmol/L | 325 | 3.58 [0.48-37.69] | 3.58 [0.48-37.69] | 3.59 [1.14-13.80] | 0.5 | 3.29 [1.14-9.44] | 3.62 [0.48-37.69] | >0.9 | 3.38 [0.69-21.53] | 3.59 [0.48-37.69] | 0.7 |
| Glucose (GLUC), mmol/L | 291 | 6.38 [2.25-30.18] | 6.40 [2.25-30.18] | 6.28 [3.68-22.75] | >0.9 | 7.61 [4.06-29.38] | 6.27 [2.25-30.18] | 0.4 | 6.17 [2.25-29.38] | 6.47 [3.57-30.18] | >0.9 |
| Creatinine (CREA), µmol/L | 327 | 74.34 [13.60-831.60] | 76.28 [13.60-831.60] | 67.12 [30.90-119.00] | >0.9 | 77.07 [37.40-190.10] | 73.97 [13.60-831.60] | 0.2 | 71.68 [29.60-235.50] | 73.15 [13.60-831.60] | 0.4 |
| Calcium (CA), mmol/L | 83 | 2.90 [0.79-8.53] | 2.60 [0.79-7.34] | 3.99 [0.79-8.53] | 0.6 | 1.46 [0.91-2.25] | 2.96 [0.79-8.53] | 0.4 | 3.44 [1.00-7.41] | 2.65 [0.79-8.53] | 0.076 |
| Sodium (NA), mmol/L | 52 | 136.90 [116.00-145.00] | 137.40 [116.00-145.00] | 135.25 [122.00-145.00] | >0.9 | 138.00 [132.00-142.00] | 136.84 [116.00-145.00] | 0.8 | 136.95 [124.00-145.00] | 136.39 [116.00-145.00] | 0.9 |
| Potassium (K), mmol/L | 52 | 3.73 [2.60-4.70] | 3.74 [2.60-4.70] | 3.71 [3.00-4.20] | >0.9 | 4.20 [3.90-4.60] | 3.71 [2.60-4.70] | 0.3 | 3.80 [2.80-4.70] | 3.70 [2.60-4.60] | 0.7 |
| CRP (crp), mg/L | 273 | 52.06 [0.02-420.20] | 48.78 [0.02-420.20] | 67.05 [0.03-393.36] | 0.8 | 56.47 [1.80-197.54] | 51.65 [0.02-420.20] | 0.11 | 66.06 [0.15-420.20] | 45.72 [0.02-411.19] | 0.061 |
| hsCRP (hscrp), ml/L | 132 | 8.48 [0.07-81.81] | 8.25 [0.07-80.63] | 9.73 [0.24-81.81] | >0.9 | 11.72 [1.76-21.20] | 8.07 [0.07-81.81] | 0.031 | 10.84 [0.52-81.81] | 7.63 [0.07-54.57] | 0.8 |
| D-Dimer, mg/L | 44 | 0.64 [0.10-6.60] | 0.75 [0.10-6.60] | 0.46 [0.10-2.20] | >0.9 | 0.65 [0.10-6.20] | 0.64 [0.10-6.60] | 0.2 | 1.08 [0.10-6.60] | 0.46 [0.10-6.20] | 0.076 |
| TCHOL, mmol/L | 212 | 7.64 [0.42-44.25] | 6.67 [0.42-44.25] | 11.32 [0.87-41.21] | 0.6 | 17.54 [1.78-41.21] | 6.43 [0.42-44.25] | 0.021 | 5.64 [0.92-25.31] | 8.49 [0.42-44.25] | 0.2 |
| Total Protein (TP), g/L | 273 | 45.39 [2.00-108.20] | 45.30 [2.00-108.20] | 45.84 [2.80-95.20] | >0.9 | 52.39 [3.20-97.00] | 44.75 [2.00-108.20] | 0.4 | 50.82 [3.10-108.20] | 43.92 [2.00-108.00] | 0.3 |
| TG, mmol/L | 292 | 1.89 [0.14-18.99] | 1.85 [0.43-18.99] | 2.10 [0.14-8.47] | 0.5 | 1.69 [0.57-5.27] | 1.91 [0.14-18.99] | 0.8 | 1.89 [0.44-8.47] | 1.85 [0.14-18.99] | 0.4 |
| Procalcitonin (PCT), ng/mL | 32 | 11.39 [0.30-70.00] | 8.44 [0.30-59.20] | 15.19 [0.30-70.00] | >0.9 | 17.65 [0.30-70.00] | 8.11 [0.30-65.50] | 0.058 | 9.87 [0.30-65.50] | 12.93 [0.30-70.00] | 0.8 |
| Leucocytes (WBC) | 344 | 6.91 [1.81-149.27] | 6.98 [1.81-149.27] | 6.61 [2.31-25.02] | >0.9 | 6.51 [2.39-28.35] | 6.97 [1.81-149.27] | >0.9 | 7.95 [2.03-149.27] | 6.50 [1.81-28.35] | 0.8 |
| Erythrocytes (RBC) | 344 | 4.46 [1.37-55.50] | 4.49 [1.37-55.50] | 4.33 [2.36-8.07] | >0.9 | 4.49 [1.58-7.68] | 4.46 [1.37-55.50] | 0.4 | 4.23 [1.37-7.68] | 4.36 [1.49-8.37] | 0.7 |
| Haemoglobin (HGB) | 344 | 11.92 [4.00-31.70] | 11.93 [4.00-31.70] | 11.90 [7.00-20.50] | >0.9 | 12.13 [4.80-17.00] | 11.89 [4.00-31.70] | 0.6 | 11.66 [5.40-16.50] | 12.03 [4.00-31.70] | 0.7 |
| Haematocrit (HCT) | 343 | 34.93 [13.50-63.00] | 34.82 [13.50-62.20] | 35.38 [22.20-63.00] | >0.9 | 35.76 [14.50-47.00] | 34.81 [13.50-63.00] | 0.4 | 34.17 [13.50-47.00] | 35.26 [14.10-63.00] | 0.5 |
| Platelets (PLT) | 343 | 222.53 [19.00-1,063.00] | 228.59 [19.00-1,063.00] | 198.43 [24.00-439.00] | 0.5 | 210.23 [83.00-440.00] | 224.34 [19.00-1,063.00] | 0.6 | 206.96 [23.00-599.00] | 230.07 [19.00-1,063.00] | 0.3 |
| Neutrophils, % | 344 | 53.92 [1.80-96.70] | 53.13 [1.80-96.70] | 57.10 [30.30-85.70] | 0.5 | 59.48 [5.80-90.20] | 53.11 [1.80-96.70] | 0.077 | 54.94 [1.80-92.50] | 53.55 [5.80-96.70] | 0.8 |
| Eosinophils, % | 344 | 2.49 [0.00-55.10] | 2.38 [0.00-55.10] | 2.91 [0.00-39.70] | >0.9 | 3.98 [0.00-46.80] | 2.27 [0.00-55.10] | 0.5 | 2.29 [0.00-55.10] | 2.52 [0.00-46.80] | 0.8 |
| Basophils, % | 344 | 0.77 [0.00-12.20] | 0.79 [0.00-12.20] | 0.66 [0.10-5.80] | >0.9 | 0.84 [0.00-10.50] | 0.76 [0.00-12.20] | 0.6 | 0.73 [0.10-7.30] | 0.79 [0.00-12.20] | 0.8 |
| Lymphocytes, % | 342 | 33.92 [0.70-76.10] | 34.51 [0.70-76.10] | 31.55 [4.40-59.50] | 0.6 | 26.74 [6.40-71.20] | 34.97 [0.70-76.10] | 0.017 | 33.62 [5.20-76.10] | 34.05 [0.70-71.40] | 0.8 |
| Monocytes, % | 344 | 9.22 [0.70-60.40] | 9.31 [0.70-60.40] | 8.86 [2.40-21.30] | >0.9 | 9.92 [1.10-21.50] | 9.11 [0.70-60.40] | 0.5 | 9.36 [1.10-60.40] | 9.15 [0.70-47.60] | >0.9 |

Table 2. Vitals and laboratory examinations

| **Pathogen** | **Frequency** |
| --- | --- |
| Human Rhinovirus/Enterovirus | 43 (12.4%) |
| SARS-CoV-2 | 38 (11.0%) |
| Influenza A | 22 ( 6.3%) |
| Respiratory Syncytial Virus | 10 ( 2.9%) |
| Human Metapneumovirus | 8 ( 2.3%) |
| Influenza B | 7 ( 2.0%) |
| Parainfluenza virus 4 | 4 ( 1.2%) |
| Coronavirus NL63 | 2 ( 0.6%) |
| Adenovirus | 1 ( 0.3%) |
| Bordetella pertussis | 1 ( 0.3%) |
| Coronavirus OC43 | 1 ( 0.3%) |
| Parainfluenza virus 3 | 1 ( 0.3%) |
| MERS-CoV | 1 ( 0.3%) |
| Mycoplasma pneumoniae | 1 ( 0.3%) |
| Missing | 1 ( 0.3%) |

Table 3. Results of multiplex PCR testing using the BioFire Respiratory Panel

| **Pathogen** | **N** | **Overall** N = 346*1* | **Admitted to hospital** N = 90*1* | **No need for hospitalisation** N = 256*1* |
| --- | --- | --- | --- | --- |
| Adenovirus | 345 | 1 (0.3%) | 1 (1.1%) | 0 (0%) |
| Coronavirus NL63 | 345 | 2 (0.6%) | 0 (0%) | 2 (0.8%) |
| Coronavirus OC43 | 345 | 1 (0.3%) | 0 (0%) | 1 (0.4%) |
| MERS-CoV | 319 | 1 (0.3%) | 0 (0%) | 1 (0.4%) |
| SARS-CoV-2 | 345 | 37 (11%) | 12 (13%) | 25 (9.8%) |
| Human Metapneumovirus | 344 | 8 (2.3%) | 3 (3.3%) | 5 (2.0%) |
| Human Rhinovirus/Enterovirus | 344 | 43 (13%) | 8 (8.9%) | 35 (14%) |
| Influenza A | 330 | 22 (6.7%) | 5 (5.9%) | 17 (6.9%) |
| Influenza B | 345 | 7 (2.0%) | 2 (2.2%) | 5 (2.0%) |
| Parainfluenza virus 3 | 345 | 1 (0.3%) | 0 (0%) | 1 (0.4%) |
| Parainfluenza virus 4 | 345 | 4 (1.2%) | 0 (0%) | 4 (1.6%) |
| Respiratory Syncytial Virus | 344 | 10 (2.9%) | 5 (5.6%) | 5 (2.0%) |
| Bordetella pertussis | 345 | 1 (0.3%) | 1 (1.1%) | 0 (0%) |
| Mycoplasma pneumoniae | 345 | 1 (0.3%) | 0 (0%) | 1 (0.4%) |
| *1*n (%) | | | | |

Table 4. Pathogens population attributable fractions for hospitalisation
